# Supplementary material
Source: PubMed Central journal article supplement (PMC7179702)
Supplement: NIHMS1570927-supplement-Supplemental_Materials.pdf [file NIHMS1570927-supplement-Supplemental_Materials.pdf]

REPLACE

## **Appendix 1. Methods and data**

With our first set of data sources, the Demographic and Health Surveys (DHS), we developed an understanding of the typology of double burden households at the nationally representative level. For all years these countries collected anthropometry on women of childbearing age and preschoolers. We linked these data with gross domestic product (GDP) per capita to examine the relationship at the country level between the double burden and 1 measure of national income. With our second set of data sources we created measures of the double burden for all nations, but for the most recent period of available data with age-specific under- and overnutrition measures these are only estimates.

### **COUNTRY ESTIMATES OF THE DOUBLE BURDEN**

#### **Country-level anthropometry**

We used data from the Institute for Health Metrics and Evaluation recently published in *Lancet*.<sup>1</sup> These publicly available data include anthropometric measures of weight and height to estimate age-specific prevalences of wasting, stunting, and overweight in all age groups. The only measure they exclude is thinness (body mass index [BMI] < 18.5) for women 19 and older.<sup>1</sup> The countries and their regions, populations, and anthropometric levels for the measures noted above are in Supplemental Table S1.

### **MEASURES FOR HOUSEHOLD AND GLOBAL ANALYSES**

#### **Global estimates for all ages for anthropometry**

For children ages 6–18 and adults we used estimates for all low- and middle-income countries (LMIC) from a recent study NCD-RisC group<sup>1</sup> In many cases this group used complex statistical algorithms to estimate the levels of stunting and overweight/obesity. The only data missing are the distributions of stunting in adults for each country. For children ages 0–5 we used a data set developed by the joint UNICEF-WHO-The World Bank group.<sup>2</sup> These preschooler data are based on the WHO Child Growth Standards of -2 standard deviations (SDs) from the standard for wasting and stunting and +2 SDs for overweight and obesity. We collected these data from disparate surveys and estimates that cover all countries, like the adult and child data. The only LMIC missing is South Sudan, so we used Sudanese data for both Sudan and South Sudan.

For the earlier period there are no data in the 1990's for many countries. UNICEF data provided the aged 0-4 data for the most recent decade but had much missing data for the 1990's so we utilized data from DHS as much as possible for the anthropometry in the 1990's for ages 0-4.

#### **Household and national estimates**

All the surveys we used had standardized protocols to measure weight and height.<sup>3</sup> We calculated BMI as weight in kilograms divided by height in meters squared ( $\text{kg}/\text{m}^2$ ). We defined thinness and overweight according to the WHO recommendations, thinness at  $\text{BMI} < 18.5 \text{ kg}/\text{m}^2$  and overweight at  $\text{BMI} \geq 25 \text{ kg}/\text{m}^2$ .<sup>4,5</sup> We adjusted BMI for women ages 15.0–17.9 according to the International Obesity Task Force definitions.<sup>3</sup>

We assessed children's anthropometric statuses by comparing data with the WHO Child Growth Standards. We used the WHO igrowup macro to calculate z-scores and excluded children with invalid z-scores for ages 0-4. We excluded 2 countries, Benin and Pakistan, from this study entirely due to their high percentages of invalid z-scores. For iron status we followed WHO cutoffs for children and women.<sup>6</sup>

We calculated the annualized change in prevalence by dividing the absolute change in levels by the number of years between surveys to provide a comparable measure of positive or negative change for all measures of malnutrition in countries for which we have 2 years of data. For a detailed presentation of the observed heterogeneity, we selected a set of countries for which we had pre-1997 and post-2011 data and time spans from 16 to 24 years as examples.

### **Country-level burden of malnutrition**

For the severity of the double burden in children at the country level we used the recent WHO/UNICEF guidelines for high levels of overweight/obesity, wasting, and stunting.<sup>2</sup> The prevalence levels we used to designate a country's population as high in wasting, overweight, or stunting are  $\geq 15\%$ ,  $\geq 15\%$ , and  $\geq 30\%$ , respectively. Meeting any of these criteria meant a country faced undernutrition according to anthropometric status.

For women there is no clear cutoff for overweight and obesity. Thus, we present data based on 40%, 30%, and 30% cutoffs for overweight prevalence in the population. We designated  $\geq 20\%$  as the underweight cutoff for thinness prevalence. There is no global agreement on what constitutes a country with excessive overweight and obesity or thinness, so we selected these based on distribution and where we found major breaks and excessively high burdens. The countries who fit these criteria for the double burden spelled out above are found in Supplemental tables S1 and S2.

### **HOUSEHOLD-LEVEL ANALYSIS**

#### **Data sources**

Most of our data are from the DHS, a series of nationally representative surveys typically conducted every 5 years (available at <http://www.measuredhs.com>). Details of the DHS sampling methodology are described elsewhere.<sup>7</sup> Additional data are from the 1993 and 2014 Indonesian Family Life Survey (representative of 83% of the Indonesian population),<sup>8,9</sup> the 1991 and 2015 China Health and Nutrition Survey (representative of 56% of the Chinese population),<sup>10</sup> the 2013 Brazil National Health Survey (1996 data from the DHS),<sup>11,12</sup> the 1988 and 2012 Mexico National Survey of Health and Nutrition (ENSANUT, nationally representative),<sup>13-16</sup> and the 1992 and 2002 Vietnam Living Standards Surveys.<sup>17</sup> For Mexico we eliminated the small ENSANUT 2016, which was collected in a different season than the other surveys.

The sample data for the earliest and the most recent surveys available for each country are in Supplemental Table S3. The supplemental tables include the data discussed below—population size, GDP per capita based on purchasing power parity (GDP [PPP]), and sample size.

#### **Study population and sample size**

We restricted all analyses to nonpregnant women ages 15–49 and children ages 0–4. Pregnancy status was available for all countries. The countries for which data were available and the sample sizes are in Supplemental Table S1. Our arrangement of countries into regions follows the World Bank's.<sup>18</sup> For countries with only 1 survey, we included that single survey (Supplemental Table S1). For countries with more than 3 surveys, we included only the oldest and the most recent. The overall total sample size was 469,564 households with at least 1 child age 0–4 and 816,469 households with a nonpregnant woman age 15–49. Additionally, 438,877 households had both a child age 0–4 and a woman age 15–49. In total the analyses included 1,098,378 women 15–49 and 664,547 children 0–4.

We conducted direct measurements of the data sets available to us so we could apply the same measures noted below to all and the same cutoffs for erroneous measurements and weigh the data to be nationally representative (except China, which is representative of 56% of the population). Lacking adequate population coverage to present regional averages, we focused on country results and selected countries in which the most recent survey was after 2011 and the earliest survey was before 1997 (yielding intervals of 16–24 years) to give some sense of the heterogeneity of long-term trends (Supplemental Figure 6). The UNICEF-WHO-The World Bank Joint Child Malnutrition Estimates are the best recent regional estimates.<sup>19</sup>

#### **GDP per capita based on purchasing power parity**

GDP (PPP) is a measure of GDP divided by the midyear population (GDP/capita) for each country.<sup>18</sup> For our GDP (PPP) measures we used World Bank data, which evaluate the cost of a given basket of goods to equalize exchange rates and ascertain exact values in purchasing terms for each country.<sup>20</sup>

## Statistical analysis

We used STATA version 14.2 (StataCorp, College Station, Texas) for all statistical analyses. All results are nationally weighted to be representative of the country. We adjusted age to the world age structure and felt that it did not significantly impact the results, so we present only the nationally representative weighted results. We weighted regional results by each country's 2010 population for the most recent period and by its 1990 population for the earlier period.

For the regression results we used ordinary least squares with controls for population size and for the GDP/capita relationship. For each outcome we tested linear, quadratic (second-degree polynomial), and cubic polynomial (third-degree polynomial) versions of GDP/capita. We kept the most appropriate relationship in terms of statistical significance.

## Equity: Does overweight differ by socioeconomic status?

We followed a method that our group published earlier.<sup>21</sup> Our outcomes of interest were (1) overweight prevalence difference defined by the difference in overweight prevalence between the lowest and the highest wealth or education quintiles for each survey wave and (2) the annualized difference in the rate of overweight prevalence growth for the lowest and highest wealth or education quintiles between the first and last survey waves. We calculated overweight prevalence difference in each survey wave in each country for wealth quintiles by  $\text{Overweight Prevalence}_{\text{lowest quintile}} - \text{Overweight Prevalence}_{\text{highest quintile}}$ . A positive overweight prevalence difference indicates that the lower wealth quintile had a higher prevalence of overweight compared to the higher wealth quintile. To obtain the annualized difference in overweight prevalence growth rates between wealth quintiles, we took the difference between the change in overweight prevalence in the lowest group over the survey period and the change in the highest group over the survey period:  $(\text{Overweight}_{\text{lowest, lastwave}} - \text{Overweight}_{\text{lowest, firstwave}}) - (\text{Overweight}_{\text{highest, lastwave}} - \text{Overweight}_{\text{highest, firstwave}})$ . We annualized this result for each country. A positive difference in prevalence growth rates indicates that the lowest wealth quintile had a higher prevalence growth rate than did the highest quintile, and this gap is growing.

## Euromonitor data: Country-level sales of sugar-sweetened beverages and nonessential or junk foods

Comparable data on sales of sugar-sweetened beverages (SSBs) are available for hundreds of countries from Euromonitor International Passport.<sup>22</sup> In a new database Euromonitor collected caloric information for most beverages on a country by country basis. With these data we estimated kilocalorie/capita/day trends in sales for a limited number of years (2009–2014). We were the beta tester of the new Euromonitor data, which are now publicly available to subscribers. Longer-term trends from 2000 are available for volume in milliliters (ml). In both cases we combined sales of what Euromonitor terms off-trade volume (i.e., supermarkets, retailers) and on-trade volume (i.e., restaurants, cafeterias). All volume data are reported in ml/capita/day. We suspect these Euromonitor data omit many small local bottlers, but no rigorous study has evaluated the completeness of the data. We define SSBs as regular cola carbonates, noncola carbonates (e.g., lemon/lime and orange carbonates, ginger ale, mixers), liquid and powder concentrates, juice drinks (up to 24% juice), nectars (25–99% juice), ready-to-drink coffees and teas, sports and energy drinks, and Asian specialty drinks.

Nonessential or “junk” foods include cakes, pastries, chocolate and sugar confectioneries, chilled and shelf-stable desserts, frozen baked goods, frozen desserts, ice cream, sweet biscuits, snack bars, processed fruit snacks, salty snacks, savory biscuits, popcorn, pretzels, and other savory snacks. Clearly, these are aggregate measures, and we omit many items and likely include some that would be termed healthful foods and not ultraprocessed junk foods.

## References

1. Abarca-Gómez L, Abdeen ZA, Hamid ZA, et al. Worldwide trends in body-mass index, underweight, overweight, and obesity from 1975 to 2016: a pooled analysis of 2416 population-based measurement studies in 128.9 million children, adolescents, and adults. *The Lancet* 2017; 390(10113): 2627-42.
2. UNICEF, WHO, World Bank Group. Ranges of prevalence levels for wasting, overweight and stunting. 2017 <https://data.unicef.org/topic/nutrition/malnutrition/> (accessed Nov 10 2017).
3. USAID. MEASURE DHS Biomarker Field Manual: Demographic and health surveys methodology 2012. [https://dhsprogram.com/pubs/pdf/DHSM7/DHS6\\_Biomarker\\_Manual\\_9Jan2012.pdf](https://dhsprogram.com/pubs/pdf/DHSM7/DHS6_Biomarker_Manual_9Jan2012.pdf) (accessed Jan 10 2017).
4. World Health Organization. Diet, nutrition, and the prevention of chronic diseases. WHO Technical Report Series; 2003; Geneva: World Health Organization; 2003.
5. World Health Organization. Physical status: the use and interpretation of anthropometry - Report of a WHO Expert Committee. In: Anthropometry WECOPSTUaIo, editor. WHO Technical Report series 854. Geneva: WHO; 1995. p. 460.
6. WHO. Haemoglobin concentrations for the diagnosis of anaemia and assessment of severity. In: Nutrition, editor. Geneva: World Health Organization; 2011. p. 6.
7. Corsi DJ, Neuman M, Finlay JE, Subramanian SV. Demographic and health surveys: a profile. *Int J Epidemiol* 2012; 41(6): 1602-13.
8. Rand Labor and Population Division. The Indonesia Family Life Survey (IFLS). 2014. <https://www.rand.org/labor/FLS/IFLS.html> (accessed March 1 2014).
9. Indonesia Family Life Surveys (IFLS). RAND Corporation. Indonesia Family Life Survey. 2005. [www.rand.org/FLS/IFLS](http://www.rand.org/FLS/IFLS) (accessed May 1 2005).
10. Popkin BM, Du S, Zhai F, Zhang B. Cohort Profile: The China Health and Nutrition Survey—monitoring and understanding socio-economic and health change in China, 1989–2011. *Int J Epidemiol* 2010; 39(6): 1435-40.
11. IBGE - Instituto Brasileiro de Geografia e Estatística. Pesquisa de Orçamentos Familiares, 2008-2009: Análise do Consumo Alimentar Pessoal no Brasil. Rio de Janeiro: Instituto Brasileiro de Geografia e Estatística., 2011.
12. Instituto Brasileiro de Geografia e Estatística. Pesquisa de orçamentos familiares 2008-2009: antropometria e estado nutricional de crianças, adolescentes e adultos no Brasil. 2010. [http://www.ibge.gov.br/home/estatistica/populacao/condicaoodevida/pof/2008\\_2009\\_encaa/pof\\_20082009\\_encaa.pdf](http://www.ibge.gov.br/home/estatistica/populacao/condicaoodevida/pof/2008_2009_encaa/pof_20082009_encaa.pdf) (accessed 22 May 2013).
13. Gutiérrez J, Rivera-Dommarco J, Shamah-Levy T, et al. Encuesta Nacional de Salud y Nutrición 2012. Resultados Nacionales. Cuernavaca, México: Instituto Nacional de Salud Pública (MX), 2012. *Psicología y Salud* 2012; 25(1): 111-22.
14. Olaiz-Fernández G, Rivera-Dommarco J, Shamah-Levy T, et al. Encuesta Nacional de Salud y Nutrición 2006. Cuernavaca, México: Instituto Nacional de Salud Pública. 2007.
15. Resano-Pérez E, Méndez-Ramírez I, Shamah-Levy T, Rivera JA, Sepúlveda-Amor J. Methods of the national nutrition survey 1999. *Salud Pública Mex* 2003; 45(Suppl 4): 558-64.
16. Romero-Martínez M, Shamah-Levy T, Franco-Núñez A, et al. Encuesta Nacional de Salud y Nutrición 2012: diseño y cobertura. *Salud Pública Mex* 2013; 55: S332-S40.
17. Tuan N, Tuong P, Popkin B. Body mass index (BMI) dynamics in Vietnam. *Eur J Clin Nutr* 2008; 62(1): 78-86.
18. World Bank. DataBank: World Development Indicators. 2017. <http://databank.worldbank.org/data/reports.aspx?source=2&series=NY.GNP.PCAP.PP.CD&country=>.
19. UNICEF, WHO, The World Bank. Levels and trends in child malnutrition: joint child malnutrition estimates. 2017. [http://www.who.int/nutgrowthdb/jme\\_brochure2017.pdf](http://www.who.int/nutgrowthdb/jme_brochure2017.pdf).
20. Rogoff K. The purchasing power parity puzzle. *J Econ Lit* 1996; 34(2): 647-68.
21. Jones-Smith JC, Gordon-Larsen P, Siddiqi A, Popkin BM. Is the burden of overweight shifting to the poor across the globe? Time trends among women in 39 low- and middle-income countries (1991-2008). *Int J Obes* 2012; 36(8): 1114-20.
22. Euromonitor International. Passport Nutrition. 2018. <http://www.euromonitor.com/>. (accessed January 4 2018).

Supplemental Table S1. Country burdens by age, sex, and region in 1990s UNICEF and NCD-RisC surveys with DHS for preschoolers where gaps existed

| World Bank Region                                  | Country                                     | Population           | GDP per capita* | Kids (0-4)   |              |             | Girls (5-18) |             | Boys (5-18)  |             | Women (19+)  |              | Men (19+)    |              | Double burden based on anthropometry** |                 |                 |
|----------------------------------------------------|---------------------------------------------|----------------------|-----------------|--------------|--------------|-------------|--------------|-------------|--------------|-------------|--------------|--------------|--------------|--------------|----------------------------------------|-----------------|-----------------|
|                                                    |                                             |                      |                 | Wasting      | Stunting     | Overweight  | Wasting      | Overweight  | Wasting      | Overweight  | Thin         | Overweight   | Thin         | Overweight   | >40% overweight                        | >30% overweight | >20% overweight |
| <b>Global Total: All Countries</b>                 |                                             | <b>4,332,508,167</b> |                 | <b>11.30</b> | <b>43.73</b> | <b>6.77</b> | <b>10.17</b> | <b>6.47</b> | <b>16.19</b> | <b>5.89</b> | <b>16.08</b> | <b>24.21</b> | <b>15.58</b> | <b>19.34</b> | <b>15</b>                              | <b>22</b>       | <b>45</b>       |
| <b>East Asia &amp; Pacific</b>                     | Cambodia                                    | 10,653,558           | 801             | 13.4         | 58.6         | 6.5         | 7.8          | 2.3         | 15.8         | 2.3         | 20.6         | 13.8         | 18.7         | 9.5          |                                        |                 |                 |
|                                                    | China                                       | 1,204,855,000        | 1,869           | 2.9          | 36.7         | 9.3         | 5.4          | 5.0         | 6.8          | 6.6         | 9.7          | 19.4         | 8.1          | 17.8         |                                        |                 |                 |
|                                                    | Fiji                                        | 775,498              | 4,584           | 9.8          | 4.3          | 2.2         | 3.6          | 26.3        | 5.4          | 14.3        | 3.3          | 56.3         | 3.3          | 45.7         |                                        |                 |                 |
|                                                    | Indonesia                                   | 196,957,849          | 4,384           | 12.7         | 51.9         | 4.4         | 8.5          | 4.0         | 14.2         | 3.1         | 19.9         | 17.3         | 20.9         | 10.5         |                                        |                 |                 |
|                                                    | Lao People's Democratic Rep. (The)          | 4,851,923            | 1,475           | 11.8         | 53.6         |             | 6.4          | 2.6         | 14.9         | 2.3         | 18.6         | 14.6         | 18.4         | 9.4          |                                        |                 |                 |
|                                                    | Malaysia                                    | 20,495,597           | 10,646          | 15.3         | 20.7         | 5.5         | 8.0          | 8.1         | 12.6         | 8.8         | 12.6         | 26.9         | 12.9         | 20.7         |                                        |                 | HI              |
|                                                    | Mongolia                                    | 2,298,039            | 3,094           | 2.4          | 33.1         |             | 2.4          | 12.5        | 3.2          | 8.1         | 4.1          | 43.5         | 3.7          | 40.0         | HI                                     | HI              | HI              |
|                                                    | Myanmar                                     | 43,237,792           | 676             | 12.7         | 53.6         |             | 9.7          | 2.9         | 17.3         | 2.7         | 21.1         | 16.1         | 21.4         | 10.3         |                                        |                 |                 |
|                                                    | Philippines (The)                           | 69,835,715           | 2,887           | 6.9          | 43.3         |             | 5.8          | 4.8         | 13.5         | 5.1         | 18.5         | 20.4         | 16.1         | 15.7         |                                        |                 | HI              |
|                                                    | Thailand                                    | 59,491,790           | 6,840           | 7.3          | 21.1         |             | 7.5          | 5.6         | 12.1         | 5.8         | 14.1         | 20.6         | 15.7         | 13.3         |                                        |                 |                 |
| Vanuatu                                            | 168,235                                     | 1,903                | 6.8             | 25.7         |              | 1.3         | 20.9         | 2.5         | 9.3          | 4.5         | 47.8         | 2.3          | 38.7         |              |                                        |                 |                 |
| Viet Nam                                           | 71,995,500                                  | 1,425                | 8.7             | 67.6         | 4.0          | 12.8        | 1.5          | 19.0        | 1.2          | 26.5        | 10.9         | 25.1         | 6.6          |              |                                        |                 |                 |
| <b>Region Total: East Asia &amp; Pacific</b>       |                                             | <b>1,685,616,496</b> |                 | <b>5.1</b>   | <b>39.9</b>  | <b>7.4</b>  | <b>6.3</b>   | <b>4.7</b>  | <b>9.1</b>   | <b>5.8</b>  | <b>12.5</b>  | <b>18.9</b>  | <b>11.4</b>  | <b>16.0</b>  | <b>1</b>                               | <b>1</b>        | <b>3</b>        |
| <b>Europe &amp; Central Asia</b>                   | Albania                                     | 3,187,784            | 2,782           | 8.1          | 20.4         | 9.5         | 2.6          | 7.7         | 2.5          | 10.2        | 3.3          | 40.5         | 0.9          | 48.6         |                                        |                 |                 |
|                                                    | Armenia                                     | 3,217,342            | 1,585           | 3.3          | 15.1         | 10.8        | 1.8          | 15.6        | 2.8          | 11.8        | 4.2          | 47.0         | 3.0          | 44.7         |                                        |                 |                 |
|                                                    | Azerbaijan                                  | 7,685,000            | 2,420           | 3.8          | 28.0         | 6.1         | 2.7          | 12.4        | 4.1          | 9.5         | 4.2          | 43.9         | 2.6          | 41.6         |                                        |                 |                 |
|                                                    | Georgia                                     | 4,734,000            | 1,673           | 3.1          | 16.1         | 17.9        | 3.0          | 12.6        | 3.6          | 10.4        | 4.8          | 43.7         | 2.7          | 42.9         |                                        |                 |                 |
|                                                    | Kazakhstan                                  | 15,815,626           | 6,039           | 9.2          | 23.3         | 6.3         | 2.4          | 13.0        | 3.4          | 10.6        | 4.8          | 43.7         | 3.2          | 43.2         |                                        |                 |                 |
|                                                    | Kyrgyzstan                                  | 4,560,400            | 1,237           | 2.9          | 36.2         | 8.1         | 3.1          | 9.3         | 4.6          | 6.6         | 5.7          | 37.6         | 3.7          | 36.5         |                                        | HI              | HI              |
|                                                    | Romania                                     | 22,684,270           | 5,453           | 3.3          | 11.2         | 4.0         | 4.2          | 9.7         | 4.7          | 12.8        | 2.8          | 45.6         | 1.6          | 53.0         |                                        |                 |                 |
|                                                    | Tajikistan                                  | 5,764,712            | 926             | 11.4         | 41.5         |             | 3.6          | 8.2         | 5.1          | 5.5         | 6.8          | 35.0         | 4.4          | 34.1         |                                        | HI              | HI              |
|                                                    | Former Yugoslav Republic of Macedonia (The) | 1,983,252            | 4,704           | 1.7          | 8.0          | 9.6         |              |             |              |             | 2.8          | 46.9         | 0.9          | 55.2         |                                        |                 |                 |
|                                                    | Turkey                                      | 58,486,381           | 7,487           | 5.5          | 27.5         | 7.0         | 4.5          | 17.1        | 7.0          | 13.6        | 2.5          | 58.8         | 2.4          | 49.8         |                                        |                 |                 |
| Uzbekistan                                         | 22,785,000                                  | 1,635                | 15.5            | 42.8         | 26.1         | 2.9         | 9.7          | 4.4         | 7.0          | 5.8         | 37.9         | 3.5          | 36.8         | HI           | HI                                     | HI              |                 |
| <b>Region Total: Europe &amp; Central Asia</b>     |                                             | <b>150,903,767</b>   |                 | <b>7.0</b>   | <b>26.7</b>  | <b>9.6</b>  | <b>3.6</b>   | <b>13.0</b> | <b>5.2</b>   | <b>11.0</b> | <b>3.8</b>   | <b>48.5</b>  | <b>2.6</b>   | <b>45.9</b>  | <b>1</b>                               | <b>3</b>        | <b>3</b>        |
| <b>Latin America &amp; Caribbean</b>               | Argentina                                   | 34,994,814           | 10,130          | 1.6          | 7.1          | 11.1        | 1.2          | 25.1        | 1.4          | 27.0        | 1.9          | 52.3         | 1.0          | 54.1         |                                        |                 |                 |
|                                                    | Bolivia (Plurinational State of)            | 7,566,714            | 2,994           | 6.8          | 37.9         | 9.7         | 0.9          | 18.5        | 2.5          | 13.0        | 2.2          | 49.0         | 3.0          | 37.9         | HI                                     | HI              | HI              |
|                                                    | Brazil                                      | 162,296,612          | 8,073           | 4.1          | 15.1         | 8.0         | 3.1          | 17.5        | 4.3          | 15.4        | 5.4          | 45.2         | 4.3          | 41.9         |                                        |                 |                 |
|                                                    | Colombia                                    | 37,441,977           | 6,156           | 2.4          | 22.9         | 6.2         | 2.4          | 17.2        | 3.2          | 13.6        | 3.7          | 52.3         | 3.8          | 43.1         |                                        |                 |                 |
|                                                    | Costa Rica                                  | 3,510,926            | 6,533           | 2.4          | 8.2          | 9.5         | 2.4          | 17.4        | 3.1          | 13.3        | 4.2          | 48.5         | 3.2          | 40.9         |                                        |                 |                 |
|                                                    | Dominican Republic (The)                    | 7,892,423            | 4,751           | 3.6          | 25.1         | 7.3         | 3.4          | 17.9        | 4.8          | 14.4        | 5.9          | 50.7         | 7.0          | 36.4         |                                        |                 |                 |
|                                                    | Ecuador                                     | 11,440,583           | 5,633           | 3.2          | 32.5         |             | 1.3          | 17.7        | 2.4          | 13.7        | 2.1          | 49.0         | 1.9          | 39.4         | HI                                     | HI              | HI              |
|                                                    | El Salvador                                 | 5,611,115            | 3,911           | 1.4          | 29.5         | 3.9         | 1.7          | 18.5        | 3.2          | 13.0        | 3.7          | 49.4         | 3.5          | 40.8         |                                        |                 |                 |
|                                                    | Guatemala                                   | 10,408,489           | 4,082           | 6.7          | 63.1         | 10.1        | 1.7          | 15.8        | 2.0          | 11.4        | 3.2          | 47.2         | 3.4          | 37.2         | HI                                     | HI              | HI              |
|                                                    | Guyana                                      | 761,291              | 2,852           | 13.3         | 14.0         | 1.9         | 5.3          | 11.6        | 6.9          | 8.3         | 7.4          | 43.2         | 8.6          | 28.7         |                                        |                 |                 |
|                                                    | Haiti                                       | 7,819,806            | 1,275           | 14.4         | 47.3         | 7.8         | 4.9          | 10.0        | 5.6          | 8.7         | 9.7          | 39.5         | 8.0          | 29.0         |                                        | HI              | HI              |
|                                                    | Honduras                                    | 5,709,051            | 2,388           | 2.1          | 42.5         |             | 2.8          | 14.8        | 3.5          | 10.4        | 4.6          | 45.6         | 4.6          | 36.0         | HI                                     | HI              | HI              |
|                                                    | Jamaica                                     | 2,537,440            | 6,159           | 5.3          | 9.1          |             | 1.8          | 16.9        | 2.7          | 12.5        | 5.5          | 51.1         | 9.0          | 31.7         |                                        |                 |                 |
|                                                    | Mexico                                      | 94,045,579           | 8,390           | 8.7          | 30.9         | 9.2         | 2.2          | 23.9        | 2.4          | 23.1        | 2.5          | 57.1         | 2.2          | 50.8         | HI                                     | HI              | HI              |
|                                                    | Nicaragua                                   | 4,612,228            | 2,149           | 5.1          | 35.9         | 11.4        | 1.9          | 18.8        | 3.1          | 13.4        | 3.6          | 50.6         | 4.0          | 41.2         | HI                                     | HI              | HI              |
|                                                    | Panama                                      | 2,739,730            | 6,749           | 1.4          | 21.5         | 6.2         | 2.4          | 18.4        | 3.1          | 13.8        | 4.1          | 50.0         | 3.9          | 41.6         |                                        |                 |                 |
|                                                    | Paraguay                                    | 4,760,850            | 4,840           | 0.6          | 18.3         | 6.3         | 2.4          | 14.5        | 3.1          | 12.0        | 4.2          | 40.9         | 2.9          | 38.3         |                                        |                 |                 |
| Peru                                               | 24,038,760                                  | 4,540                | 3.1             | 42.7         | 13.6         | 1.1         | 19.5         | 2.2         | 15.6         | 2.1         | 51.4         | 2.0          | 41.9         | HI           | HI                                     | HI              |                 |
| Venezuela (Bolivarian Republic of)                 | 22,188,667                                  | 11,172               | 5.7             | 18.6         | 4.0          | 1.7         | 27.1         | 2.2         | 23.9         | 2.1         | 57.9         | 2.2          | 51.6         |              |                                        |                 |                 |
| <b>Region Total: Latin America &amp; Caribbean</b> |                                             | <b>450,377,055</b>   |                 | <b>4.9</b>   | <b>23.5</b>  | <b>8.1</b>  | <b>2.4</b>   | <b>19.8</b> | <b>3.2</b>   | <b>17.7</b> | <b>3.9</b>   | <b>50.1</b>  | <b>3.3</b>   | <b>44.5</b>  | <b>7</b>                               | <b>8</b>        | <b>8</b>        |

Continued...

| World Bank Region                                   | Country                            | Population           | GDP per capita* | Kids (0-4)  |             |             | Girls (5-18) |             | Boys (5-18) |             | Women (19+) |             | Men (19+)   |             | Double burden based on anthropometry** |                 |                 |
|-----------------------------------------------------|------------------------------------|----------------------|-----------------|-------------|-------------|-------------|--------------|-------------|-------------|-------------|-------------|-------------|-------------|-------------|----------------------------------------|-----------------|-----------------|
|                                                     |                                    |                      |                 | Wasting     | Stunting    | Overweight  | Wasting      | Overweight  | Wasting     | Overweight  | Thin        | Overweight  | Thin        | Overweight  | >40% overweight                        | >30% overweight | >20% overweight |
| Middle East & North Africa                          | Algeria                            | 28,904,298           | 6,777           | 7.1         | 22.9        | 8.7         | 5.0          | 16.3        | 9.2         | 12.7        | 5.7         | 52.8        | 7.2         | 40.9        |                                        |                 |                 |
|                                                     | Djibouti                           | 630,388              | 766             | 14.9        | 31.7        |             | 4.1          | 15.3        | 9.2         | 7.9         | 8.4         | 37.4        | 12.0        | 24.6        |                                        |                 |                 |
|                                                     | Egypt                              | 63,714,386           | 4,588           | 6.6         | 40.5        | 21.8        | 2.4          | 20.7        | 5.6         | 16.3        | 1.9         | 58.3        | 3.2         | 44.7        | HI                                     | HI              | HI              |
|                                                     | Iran (Islamic Republic of)         | 60,575,644           | 9,069           | 8.1         | 24.4        | 5.5         | 6.7          | 14.9        | 10.4        | 12.1        | 5.3         | 53.5        | 6.3         | 41.5        |                                        |                 |                 |
|                                                     | Iraq                               | 20,208,387           | 4,783           | 4.4         | 27.6        |             | 3.8          | 21.3        | 7.7         | 17.7        | 2.9         | 60.2        | 4.0         | 49.6        |                                        |                 |                 |
|                                                     | Jordan                             | 4,572,904            | 5,027           | 3.9         | 16.3        | 7.5         | 3.1          | 21.5        | 5.7         | 17.5        | 1.8         | 64.3        | 2.1         | 54.0        |                                        |                 |                 |
|                                                     | Lebanon                            | 3,033,394            | 9,077           | 3.6         | 17.2        | 20.8        | 3.8          | 24.0        | 6.6         | 23.2        | 3.0         | 62.6        | 2.5         | 55.4        |                                        |                 |                 |
|                                                     | Libya                              | 4,948,798            | 16,640          | 3.6         | 21.1        | 13.4        | 4.1          | 22.8        | 7.7         | 19.8        | 2.3         | 62.8        | 3.6         | 51.8        |                                        |                 |                 |
|                                                     | Morocco                            | 27,075,232           | 2,855           | 4.5         | 38.7        | 16.6        | 4.8          | 14.6        | 9.6         | 11.1        | 5.2         | 51.5        | 5.5         | 41.5        | HI                                     | HI              | HI              |
|                                                     | Syrian Arab Republic (The)         | 14,345,492           | 989             | 10.0        | 32.9        | 15.0        | 5.1          | 15.1        | 9.2         | 11.7        | 4.1         | 53.6        | 4.6         | 43.2        | HI                                     | HI              | HI              |
| Tunisia                                             | 9,113,975                          | 4,470                | 7.2             | 11.9        | 1.4         | 4.7         | 15.0         | 9.2         | 9.9         | 4.7         | 55.1        | 5.7         | 42.9        |             |                                        |                 |                 |
| Yemen                                               | 15,320,653                         | 2,575                | 14.3            | 52.4        | 8.1         | 9.8         | 7.9          | 19.0        | 5.1         | 12.6        | 37.0        | 9.0         | 29.3        |             | HI                                     | HI              |                 |
| <b>Region Total: Middle East &amp; North Africa</b> |                                    | <b>252,443,551</b>   |                 | <b>7.2</b>  | <b>31.5</b> | <b>11.6</b> | <b>4.8</b>   | <b>17.0</b> | <b>9.0</b>  | <b>13.4</b> | <b>4.5</b>  | <b>54.4</b> | <b>5.2</b>  | <b>42.8</b> | <b>3</b>                               | <b>5</b>        | <b>5</b>        |
| South Asia                                          | Afghanistan                        | 17,099,541           | 876             | 18.2        | 53.2        | 6.5         | 13.7         | 2.3         | 28.4        | 1.8         | 23.4        | 14.5        | 23.4        | 10.6        |                                        |                 |                 |
|                                                     | Bangladesh                         | 118,706,871          | 1,048           | 27.9        | 66.8        | 3.6         | 15.7         | 2.1         | 28.1        | 1.9         | 31.7        | 11.8        | 27.3        | 8.9         |                                        |                 |                 |
|                                                     | Bhutan                             | 514,877              | 2,112           | 2.5         | 47.7        | 3.9         | 14.2         | 2.1         | 26.7        | 1.9         | 18.7        | 15.5        | 18.4        | 11.9        |                                        |                 |                 |
|                                                     | India                              | 960,482,795          | 1,485           | 23.9        | 57.2        | 5.5         | 22.3         | 1.5         | 34.6        | 1.3         | 31.3        | 12.5        | 30.3        | 9.2         |                                        |                 |                 |
|                                                     | Maldives                           | 255,000              | 5,672           | 16.1        | 36.1        | 1.2         | 12.0         | 3.5         | 17.3        | 3.4         | 14.7        | 19.1        | 16.8        | 11.9        |                                        |                 |                 |
|                                                     | Nepal                              | 21,396,384           | 986             | 17.9        | 62.0        | 1.2         | 12.6         | 1.6         | 26.8        | 1.4         | 25.6        | 11.9        | 22.5        | 10.1        |                                        |                 |                 |
|                                                     | Pakistan                           | 122,829,148          | 2,448           | 12.5        | 54.5        | 5.4         | 17.4         | 2.6         | 28.6        | 2.7         | 21.7        | 18.7        | 22.1        | 14.3        |                                        |                 |                 |
| Sri Lanka                                           | 18,074,000                         | 3,253                | 17.5            | 29.7        |             | 12.0        | 2.9          | 18.6        | 2.6         | 18.9        | 16.2        | 20.9        | 9.9         |             |                                        |                 |                 |
| <b>Region Total: South Asia</b>                     |                                    | <b>1,259,358,616</b> |                 | <b>22.9</b> | <b>57.4</b> | <b>5.2</b>  | <b>20.8</b>  | <b>1.7</b>  | <b>33.0</b> | <b>1.5</b>  | <b>30.0</b> | <b>13.1</b> | <b>28.8</b> | <b>9.7</b>  | <b>0</b>                               | <b>0</b>        | <b>0</b>        |
| Sub-Saharan Africa                                  | Angola                             | 14,268,994           | 1,798           | 8.6         | 61.7        | 1.6         | 7.2          | 4.9         | 16.2        | 1.2         | 15.3        | 20.9        | 20.8        | 10.4        |                                        |                 | HI              |
|                                                     | Benin                              | 5,905,558            | 1,105           | 12.3        | 39.1        | 2.4         | 6.2          | 6.4         | 15.1        | 1.9         | 11.9        | 24.3        | 14.4        | 13.2        |                                        |                 | HI              |
|                                                     | Botswana                           | 1,569,094            | 6,492           | 13.2        | 35.1        |             | 8.8          | 7.9         | 20.5        | 2.1         | 9.4         | 43.3        | 16.7        | 18.0        | HI                                     | HI              | HI              |
|                                                     | Burkina Faso                       | 10,089,878           | 651             | 25.3        | 54.6        | 5.7         | 9.3          | 2.8         | 15.4        | 0.8         | 17.4        | 16.1        | 14.4        | 8.9         |                                        |                 |                 |
|                                                     | Cameroon                           | 13,460,994           | 1,738           | 10.9        | 43.5        | 10.8        | 5.4          | 8.6         | 12.0        | 2.4         | 9.1         | 27.6        | 10.9        | 15.2        |                                        |                 | HI              |
|                                                     | Central African Republic (The)     | 3,352,767            | 621             | 12.3        | 46.8        | 5.7         | 6.8          | 5.9         | 15.5        | 1.6         | 15.6        | 22.5        | 21.1        | 11.8        |                                        |                 | HI              |
|                                                     | Chad                               | 7,000,722            | 759             | 25.5        | 59.7        | 5.0         | 8.5          | 4.5         | 16.2        | 1.2         | 17.0        | 18.8        | 16.3        | 10.6        |                                        |                 |                 |
|                                                     | Comoros (The)                      | 475,394              | 1,048           | 14.0        | 43.7        | 7.0         | 5.2          | 6.8         | 11.8        | 2.3         | 11.8        | 23.9        | 14.9        | 13.1        |                                        |                 | HI              |
|                                                     | Cote D'Ivoire                      | 14,540,820           | 2,113           | 15.4        | 38.5        | 4.1         | 5.0          | 7.7         | 13.0        | 2.5         | 10.6        | 26.1        | 12.0        | 14.7        |                                        |                 | HI              |
|                                                     | Democratic Rep. of the Congo (The) | 41,595,744           | 578             | 11.4        | 51.0        |             | 8.0          | 4.9         | 18.1        | 1.2         | 17.5        | 20.1        | 23.1        | 10.3        |                                        |                 | HI              |
|                                                     | Equatorial Guinea                  | 504,871              | 1,251           | 4.0         | 38.7        | 3.4         | 6.9          | 5.8         | 15.7        | 1.6         | 13.3        | 23.9        | 20.2        | 12.0        |                                        |                 | HI              |
|                                                     | Eritrea                            | 3,090,159            | 1,156           | 11.8        | 69.6        |             | 7.7          | 5.2         | 13.9        | 1.4         | 21.8        | 17.0        | 21.0        | 9.8         |                                        |                 |                 |
|                                                     | Ethiopia                           | 57,309,880           | 419             | 9.2         | 66.9        |             | 9.0          | 4.1         | 15.9        | 1.2         | 19.2        | 16.8        | 20.1        | 9.0         |                                        |                 |                 |
|                                                     | Gambia (The)                       | 1,066,223            | 1,048           |             | 36.1        |             | 7.6          | 6.6         | 15.1        | 2.1         | 13.3        | 24.4        | 15.2        | 13.4        |                                        |                 | HI              |
|                                                     | Ghana                              | 16,760,467           | 1,506           | 17.2        | 36.5        | 3.9         | 5.7          | 6.6         | 14.6        | 1.8         | 10.1        | 26.6        | 14.9        | 12.9        |                                        |                 | HI              |
|                                                     | Guinea                             | 7,871,173            | 957             | 16.9        | 47.5        | 8.4         | 7.4          | 5.3         | 15.2        | 1.4         | 13.7        | 21.7        | 15.2        | 11.6        |                                        |                 | HI              |
|                                                     | Kenya                              | 27,346,456           | 1,607           | 10.9        | 50.2        | 9.6         | 6.3          | 5.6         | 13.4        | 1.6         | 14.1        | 20.7        | 17.3        | 10.3        |                                        |                 | HI              |
|                                                     | Lesotho                            | 1,761,359            | 1,187           | 3.2         | 39.2        |             | 6.7          | 5.4         | 20.5        | 0.8         | 7.8         | 36.9        | 16.0        | 12.3        |                                        | HI              | HI              |
|                                                     | Madagascar                         | 13,475,400           | 1,021           | 12.2        | 60.0        | 3.9         | 6.6          | 5.1         | 12.0        | 2.0         | 19.2        | 18.2        | 18.0        | 11.1        |                                        |                 |                 |
|                                                     | Malawi                             | 9,909,088            | 598             | 10.2        | 66.7        | 14.9        | 4.6          | 5.0         | 12.6        | 1.4         | 13.1        | 19.1        | 16.0        | 10.0        |                                        |                 |                 |
| Mali                                                | 9,604,450                          | 955                  | 34.7            | 42.4        | 3.0         | 7.1         | 5.2          | 16.7        | 1.4         | 13.9        | 20.8        | 15.0        | 11.4        |             |                                        | HI              |                 |
| Mauritania                                          | 2,327,075                          | 2,087                | 17.4            | 54.8        | 6.8         | 6.8         | 7.7          | 16.9        | 2.5         | 11.0        | 27.8        | 14.2        | 15.0        |             |                                        | HI              |                 |
| Mozambique                                          | 15,759,132                         | 272                  | 14.9            | 49.3        | 7.9         | 3.1         | 7.3          | 6.1         | 2.5         | 13.8        | 21.6        | 16.1        | 11.9        |             |                                        | HI              |                 |
| Namibia                                             | 1,655,359                          | 4,298                | 15.5            | 45.1        | 8.5         | 13.6        | 5.1          | 22.6        | 1.4         | 13.0        | 35.9        | 16.1        | 15.1        |             | HI                                     | HI              |                 |
| Niger (The)                                         | 9,477,333                          | 572                  | 30.4            | 62.3        | 3.7         | 9.3         | 3.8          | 18.3        | 1.0         | 16.6        | 17.9        | 16.8        | 9.4         |             |                                        |                 |                 |
| Nigeria                                             | 108,011,465                        | 2,005                | 11.8            | 50.5        | 3.2         | 11.1        | 3.9          | 19.6        | 1.4         | 13.4        | 22.0        | 15.1        | 12.4        |             |                                        | HI              |                 |
| Rwanda                                              | 5,928,078                          | 495                  | 5.0             | 56.8        | 4.0         | 4.5         | 5.0          | 12.7        | 1.1         | 12.5        | 18.5        | 16.2        | 8.7         |             |                                        |                 |                 |
| Senegal                                             | 8,746,606                          | 1,287                | 18.3            | 50.6        | 9.6         | 9.0         | 6.2          | 17.3        | 1.8         | 13.5        | 24.5        | 16.1        | 12.9        |             |                                        | HI              |                 |
| Sierra Leone                                        | 4,274,819                          | 697                  | 10.2            | 40.9        |             | 7.7         | 6.4          | 15.0        | 1.8         | 12.9        | 23.7        | 14.6        | 12.3        |             |                                        | HI              |                 |

Continued...

| World Bank Region                       | Country      | Population         | GDP per capita* | Kids (0-4)  |             |            | Girls (5-18) |            | Boys (5-18) |            | Women (19+) |             | Men (19+)   |             | Double burden based on anthropometry** |                 |                 |
|-----------------------------------------|--------------|--------------------|-----------------|-------------|-------------|------------|--------------|------------|-------------|------------|-------------|-------------|-------------|-------------|----------------------------------------|-----------------|-----------------|
|                                         |              |                    |                 | Wasting     | Stunting    | Overweight | Wasting      | Overweight | Wasting     | Overweight | Thin        | Overweight  | Thin        | Overweight  | >40% overweight                        | >30% overweight | >20% overweight |
|                                         | South Africa | 41,426,810         | 6,586           |             | 31.5        |            | 15.8         | 6.4        | 25.9        | 2.1        | 4.4         | 54.0        | 10.6        | 25.9        | HI                                     | HI              | HI              |
| <b>Sub-Saharan Africa</b>               | Tanzania     | 29,960,776         | 998             | 13.3        | 61.2        | 9.6        | 5.6          | 5.7        | 12.3        | 1.8        | 14.2        | 21.2        | 15.9        | 12.0        |                                        |                 | HI              |
|                                         | Togo         | 4,274,024          | 876             | 18.1        | 34.7        | 3.9        | 5.4          | 5.6        | 15.4        | 1.6        | 12.5        | 22.5        | 14.3        | 12.0        |                                        |                 | HI              |
|                                         | Uganda       | 20,550,291         | 668             | 10.1        | 55.5        | 8.1        | 3.9          | 5.4        | 11.3        | 1.1        | 14.3        | 18.7        | 15.4        | 9.3         |                                        |                 |                 |
| <i>(continued)</i>                      | Zambia       | 9,137,077          | 1,480           | 10.6        | 58.0        | 7.9        | 4.6          | 7.8        | 11.3        | 3.0        | 11.5        | 25.5        | 17.1        | 13.5        |                                        |                 | HI              |
|                                         | Zimbabwe     | 11,320,346         | 1,814           | 7.9         | 32.1        | 9.1        | 6.6          | 6.8        | 19.6        | 1.3        | 6.9         | 40.8        | 14.5        | 15.1        | HI                                     | HI              | HI              |
| <b>Region Total: Sub-Saharan Africa</b> |              | <b>533,808,682</b> |                 | <b>12.0</b> | <b>51.1</b> | <b>4.3</b> | <b>8.3</b>   | <b>5.3</b> | <b>16.5</b> | <b>1.6</b> | <b>13.7</b> | <b>24.2</b> | <b>16.3</b> | <b>12.6</b> | <b>3</b>                               | <b>5</b>        | <b>26</b>       |

Data sources: UNICEF-WHO-The World Bank, 2017; NCD-RisC; and Stevens et al., 2013 supplemented for missing preschooler data with DHS measures. Most recent year of data for UNICEF, WHO, and World Bank is 2017.

\* GDP per capita based on PPP (current international \$) from World Bank Indicators

\*\* Prevalence of wasting, stunting or thinness exceed threshold and prevalence of overweight exceeds threshold

Supplemental Table S2. Country burdens by age, sex, and region in most recent UNICEF and NCD-RisC surveys

| World Bank Region                              | Country                                     | Population           | GDP per capita* | Kids (0-4)  |              |             | Girls (5-18) |              | Boys (5-18)  |              | Women (19+)  |              | Men (19+)    |              | Double burden based on anthropometry*** |                 |                 |
|------------------------------------------------|---------------------------------------------|----------------------|-----------------|-------------|--------------|-------------|--------------|--------------|--------------|--------------|--------------|--------------|--------------|--------------|-----------------------------------------|-----------------|-----------------|
|                                                |                                             |                      |                 | Wasting     | Stunting     | Overweight  | Wasting      | Overweight   | Wasting      | Overweight   | Thin         | Overweight   | Thin         | Overweight   | >40% overweight                         | >30% overweight | >20% overweight |
| <b>Global Total: All Countries</b>             |                                             | <b>5,593,022,415</b> | —               | <b>9.49</b> | <b>26.79</b> | <b>9.77</b> | <b>9.13</b>  | <b>16.52</b> | <b>12.86</b> | <b>19.69</b> | <b>11.31</b> | <b>36.54</b> | <b>10.63</b> | <b>32.67</b> | <b>10</b>                               | <b>35</b>       | <b>48</b>       |
|                                                | Cambodia                                    | 14,308,740           | 2,472           | 9.6         | 32.4         | 2.0         | 8.4          | 8.6          | 13.2         | 13.6         | 13.8         | 25.1         | 12.6         | 19.4         |                                         |                 | HI              |
|                                                | China                                       | 1,337,705,000        | 9,333           | 4.6         | 17.1         | 23.4        | 3.3          | 20.8         | 3.5          | 35.0         | 6.1          | 31.1         | 3.8          | 35.6         |                                         |                 |                 |
|                                                | Fiji                                        | 859,950              | 7,203           | 6.3         | 7.5          | 5.1         | 3.2          | 39.5         | 4.6          | 29.3         | 1.7          | 69.4         | 1.6          | 61.7         |                                         |                 |                 |
|                                                | Indonesia                                   | 242,524,123          | 8,263           | 9.9         | 35.7         | 9.0         | 8.5          | 14.2         | 11.9         | 16.4         | 12.4         | 32.3         | 12.7         | 26.0         |                                         | HI              | HI              |
|                                                | Lao People's Democratic Rep. (The)          | 6,246,274            | 4,133           | 6.4         | 43.8         | 2.0         | 6.4          | 11.6         | 11.3         | 15.5         | 11.1         | 28.9         | 11.0         | 23.4         |                                         |                 | HI              |
|                                                | Malaysia                                    | 28,112,289           | 20,680          | 8.0         | 17.7         | 7.1         | 7.0          | 23.3         | 8.0          | 30.2         | 6.8          | 44.4         | 5.7          | 43.4         |                                         |                 |                 |
|                                                | Mongolia                                    | 2,712,650            | 7,553           | 1.0         | 10.8         | 10.5        | 2.3          | 18.8         | 2.2          | 16.5         | 2.6          | 57.2         | 1.6          | 57.3         |                                         |                 |                 |
|                                                | Myanmar                                     | 50,155,896           | 3,646           | 7.0         | 29.2         | 1.3         | 10.6         | 9.9          | 15.3         | 13.4         | 14.1         | 28.8         | 14.5         | 22.1         |                                         |                 | HI              |
| <b>East Asia &amp; Pacific</b>                 | Papua New Guinea                            | 7,108,239            | 3,127           | 14.3        | 49.5         | 13.8        | 0.9          | 37.7         | 1.7          | 25.9         | 2.8          | 59.7         | 1.3          | 49.0         | HI                                      | HI              | HI              |
|                                                | Philippines (The)                           | 93,726,624           | 5,484           | 7.9         | 30.3         | 5.0         | 7.7          | 10.9         | 11.9         | 14.6         | 13.4         | 29.9         | 10.4         | 27.1         |                                         |                 | HI              |
|                                                | Samoa                                       | 186,205              | 5,291           | 1.3         | 6.4          | 6.2         | 0.1          | 57.6         | 0.2          | 47.5         | 0.4          | 83.8         | 0.1          | 75.8         |                                         |                 |                 |
|                                                | Solomon Islands                             | 527,790              | 1,834           | 4.3         | 32.8         | 2.5         | 0.7          | 30.0         | 1.5          | 16.7         | 1.9          | 62.0         | 0.9          | 51.2         | HI                                      | HI              | HI              |
|                                                | Thailand                                    | 67,208,808           | 13,214          | 6.7         | 16.3         | 10.9        | 6.9          | 19.3         | 8.5          | 25.1         | 7.9          | 36.8         | 8.6          | 30.3         |                                         |                 |                 |
|                                                | Timor-Leste                                 | 1,109,591            | 8,682           | 11.0        | 50.2         | 1.5         | 9.5          | 10.7         | 12.4         | 14.1         | 17.6         | 25.2         | 14.1         | 19.5         |                                         |                 | HI              |
|                                                | Tonga                                       | 104,137              | 4,883           | 5.2         | 8.1          | 17.3        | 0.0          | 63.1         | 0.1          | 53.0         | 0.3          | 84.0         | 0.2          | 76.9         |                                         |                 |                 |
|                                                | Tuvalu                                      | 10,531               | 2,926           | 3.3         | 10.0         | 6.3         | 0.1          | 63.0         | 0.2          | 54.0         | 0.5          | 85.7         | 0.1          | 82.2         |                                         |                 |                 |
|                                                | Vanuatu                                     | 236,295              | 2,888           | 4.4         | 28.5         | 4.6         | 1.0          | 37.0         | 1.9          | 24.5         | 2.2          | 63.7         | 1.2          | 53.9         |                                         |                 |                 |
|                                                | Viet Nam                                    | 86,932,500           | 4,319           | 6.4         | 24.6         | 5.3         | 13.1         | 7.6          | 15.4         | 11.6         | 17.9         | 21.3         | 16.8         | 16.4         |                                         |                 | HI              |
| <b>Region Total: East Asia &amp; Pacific</b>   |                                             | <b>1,939,775,642</b> | —               | <b>5.7</b>  | <b>21.0</b>  | <b>18.3</b> | <b>5.0</b>   | <b>18.5</b>  | <b>6.1</b>   | <b>29.4</b>  | <b>8.1</b>   | <b>31.2</b>  | <b>6.4</b>   | <b>32.6</b>  | <b>2</b>                                | <b>3</b>        | <b>9</b>        |
|                                                | Albania                                     | 2,913,021            | 9,637           | 9.4         | 23.1         | 23.4        | 1.4          | 20.9         | 1.1          | 29.8         | 2.0          | 52.7         | 0.4          | 66.3         |                                         |                 |                 |
|                                                | Armenia                                     | 2,877,311            | 6,567           | 4.2         | 9.4          | 13.6        | 2.0          | 20.0         | 2.3          | 18.5         | 3.2          | 56.1         | 1.7          | 56.0         |                                         |                 |                 |
|                                                | Azerbaijan                                  | 9,054,332            | 15,628          | 3.1         | 18.0         | 13.0        | 2.7          | 19.0         | 3.0          | 18.7         | 2.9          | 55.7         | 1.3          | 54.6         |                                         |                 |                 |
|                                                | Belarus                                     | 9,490,583            | 15,907          | 2.2         | 4.5          | 9.7         | 2.0          | 18.6         | 1.9          | 26.3         | 2.0          | 58.0         | 0.7          | 64.4         |                                         |                 |                 |
|                                                | Bosnia And Herzegovina                      | 3,722,084            | 9,315           | 2.3         | 8.9          | 17.4        | 2.3          | 17.8         | 2.5          | 25.9         | 2.3          | 48.6         | 0.4          | 61.5         |                                         |                 |                 |
|                                                | Bulgaria                                    | 7,395,599            | 14,949          | 3.2         | 8.8          | 13.6        | 1.9          | 23.0         | 1.8          | 33.6         | 1.8          | 56.1         | 0.3          | 70.8         |                                         |                 |                 |
|                                                | Georgia                                     | 3,926,000            | 6,598           | 1.6         | 11.3         | 19.9        | 3.1          | 19.0         | 2.4          | 20.7         | 3.3          | 55.2         | 1.3          | 56.4         |                                         |                 |                 |
|                                                | Kazakhstan                                  | 16,321,581           | 19,690          | 3.1         | 8.0          | 9.3         | 2.5          | 19.0         | 2.3          | 19.9         | 3.4          | 54.3         | 1.7          | 56.0         |                                         |                 |                 |
|                                                | Kyrgyzstan                                  | 5,447,900            | 2,734           | 2.8         | 12.9         | 7.0         | 3.3          | 16.1         | 3.3          | 16.0         | 3.7          | 50.4         | 2.0          | 49.0         |                                         |                 |                 |
| <b>Europe &amp; Central Asia</b>               | Montenegro                                  | 619,428              | 13,648          | 2.8         | 9.4          | 22.3        | 2.2          | 19.6         | 1.4          | 30.0         | 2.2          | 54.2         | 0.4          | 68.2         |                                         |                 |                 |
|                                                | Republic Of Moldova (The)                   | 3,562,045            | 3,832           | 1.9         | 6.4          | 4.9         | 2.9          | 15.4         | 2.6          | 19.3         | 2.4          | 51.7         | 1.0          | 55.1         |                                         |                 |                 |
|                                                | Romania                                     | 20,246,871           | 17,027          | 3.5         | 12.8         | 8.3         | 2.8          | 19.7         | 2.4          | 29.2         | 2.1          | 52.8         | 0.8          | 66.2         |                                         |                 |                 |
|                                                | Serbia                                      | 7,291,436            | 12,087          | 3.9         | 6.0          | 13.9        | 2.2          | 22.1         | 1.9          | 32.8         | 2.6          | 52.2         | 0.5          | 65.7         |                                         |                 |                 |
|                                                | Tajikistan                                  | 7,641,630            | 2,064           | 9.9         | 26.8         | 6.6         | 3.5          | 15.3         | 3.8          | 14.0         | 4.5          | 47.8         | 2.6          | 45.8         |                                         |                 |                 |
|                                                | Former Yugoslav Republic of Macedonia (The) | 2,070,739            | 11,285          | 1.8         | 4.9          | 12.4        | —            | —            | —            | —            | 2.2          | 52.8         | 0.5          | 66.8         |                                         |                 |                 |
|                                                | Turkey                                      | 72,326,914           | 17,443          | 1.7         | 9.5          | 10.9        | 4.6          | 28.7         | 5.1          | 30.4         | 1.5          | 71.4         | 0.9          | 66.0         |                                         |                 |                 |
|                                                | Turkmenistan                                | 5,087,210            | 9,741           | 4.2         | 11.5         | 5.9         | 3.2          | 18.0         | 3.3          | 17.9         | 3.6          | 53.1         | 1.7          | 53.7         |                                         |                 |                 |
|                                                | Ukraine                                     | 45,870,700           | 7,666           | 0.3         | 3.7          |             | 2.3          | 18.1         | 2.4          | 24.2         | 1.9          | 57.2         | 0.7          | 63.2         |                                         |                 |                 |
|                                                | Uzbekistan                                  | 28,562,400           | 4,154           | 4.5         | 19.6         | 12.8        | 2.9          | 16.9         | 3.2          | 16.3         | 3.8          | 50.5         | 2.0          | 48.9         |                                         |                 |                 |
| <b>Region Total: Europe &amp; Central Asia</b> |                                             | <b>254,427,784</b>   | —               | <b>2.6</b>  | <b>10.5</b>  | <b>9.1</b>  | <b>3.1</b>   | <b>21.2</b>  | <b>3.3</b>   | <b>24.7</b>  | <b>2.4</b>   | <b>58.9</b>  | <b>1.1</b>   | <b>60.9</b>  | <b>0</b>                                | <b>0</b>        | <b>0</b>        |
|                                                | Argentina                                   | 41,223,889           | 18,334          | 1.2         | 8.2          | 9.9         | 1.0          | 31.9         | 0.9          | 41.0         | 1.1          | 61.0         | 0.3          | 68.0         |                                         |                 |                 |
|                                                | Belize                                      | 321,608              | 7,717           | 1.8         | 15.0         | 7.3         | 3.4          | 28.7         | 3.5          | 28.3         | 2.7          | 63.1         | 3.3          | 49.7         |                                         |                 |                 |
| <b>Latin America &amp; Caribbean</b>           | Bolivia (Plurinational State of)            | 9,918,242            | 5,298           | 1.6         | 18.1         | 11.8        | 0.7          | 29.9         | 1.6          | 26.2         | 1.3          | 61.3         | 1.3          | 53.8         |                                         |                 |                 |
|                                                | Brazil                                      | 196,796,269          | 14,243          | 1.6         | 7.1          | 7.3         | 2.4          | 26.6         | 3.0          | 30.0         | 3.1          | 57.1         | 1.8          | 59.4         |                                         |                 |                 |
|                                                | Colombia                                    | 45,918,097           | 10,680          | 0.9         | 12.7         | 4.8         | 1.7          | 26.3         | 2.3          | 22.5         | 2.4          | 63.0         | 1.6          | 58.4         |                                         |                 |                 |
|                                                | Costa Rica                                  | 4,545,280            | 12,737          | 1.0         | 5.6          | 8.1         | 1.5          | 33.1         | 1.9          | 30.3         | 2.1          | 65.0         | 1.0          | 61.7         |                                         |                 |                 |
|                                                | Cuba                                        | 11,333,051           | 5,676           | 2.4         | 7.0          |             | 3.3          | 29.3         | 3.5          | 31.4         | 4.3          | 64.3         | 3.9          | 56.3         |                                         |                 |                 |

Continued...



| World Bank Region                                   | Country                        | Population    | GDP per capita* | Kids (0-4)  |             |             | Girls (5-18) |             | Boys (5-18) |             | Women (19+) |             | Men (19+)   |            | Double burden based on anthropometry*** |                 |                 |
|-----------------------------------------------------|--------------------------------|---------------|-----------------|-------------|-------------|-------------|--------------|-------------|-------------|-------------|-------------|-------------|-------------|------------|-----------------------------------------|-----------------|-----------------|
|                                                     |                                |               |                 | Wasting     | Stunting    | Overweight  | Wasting      | Overweight  | Wasting     | Overweight  | Thin        | Overweight  | Thin        | Overweight | >40% overweight                         | >30% overweight | >20% overweight |
| Latin America & Caribbean<br>(continued)            | Dominican Republic (The)       | 9,897,985     | 10,907          | 2.4         | 7.1         | 7.6         | 3.3          | 32.5        | 3.3         | 33.0        | 3.1         | 67.2        | 2.6         | 58.7       |                                         |                 |                 |
|                                                     | Ecuador                        | 14,934,690    | 9,163           | 2.3         | 25.2        | 7.5         | 0.9          | 29.1        | 1.5         | 27.4        | 1.2         | 60.7        | 0.9         | 54.2       |                                         |                 |                 |
|                                                     | El Salvador                    | 6,164,626     | 6,173           | 2.1         | 13.6        | 6.4         | 1.2          | 33.5        | 2.0         | 28.0        | 2.0         | 63.9        | 1.3         | 58.8       |                                         |                 |                 |
|                                                     | Guatemala                      | 14,630,417    | 6,578           | 0.7         | 46.5        | 4.7         | 1.1          | 30.6        | 1.3         | 26.2        | 1.7         | 61.5        | 1.5         | 53.1       | HI                                      | HI              | HI              |
|                                                     | Guyana                         | 746,556       | 5,730           | 6.4         | 12.0        | 5.3         | 5.4          | 25.8        | 5.3         | 23.9        | 4.2         | 58.4        | 4.8         | 43.0       |                                         |                 |                 |
|                                                     | Haiti                          | 9,999,617     | 1,472           | 5.3         | 24.9        | 5.0         | 4.4          | 24.5        | 3.4         | 30.4        | 4.6         | 60.1        | 3.1         | 52.8       |                                         |                 |                 |
|                                                     | Honduras                       | 8,194,778     | 3,891           | 1.4         | 22.7        | 5.2         | 1.9          | 29.6        | 2.3         | 24.9        | 2.4         | 61.2        | 2.0         | 53.5       |                                         |                 |                 |
|                                                     | Jamaica                        | 2,817,210     | 7,834           | 3.0         | 5.7         | 7.8         | 1.8          | 30.9        | 1.9         | 29.2        | 3.1         | 65.0        | 4.3         | 49.0       |                                         |                 |                 |
|                                                     | Mexico                         | 117,318,941   | 14,859          | 1.0         | 12.4        | 5.2         | 1.4          | 35.2        | 1.6         | 35.8        | 1.5         | 67.6        | 0.8         | 65.4       |                                         |                 |                 |
|                                                     | Nicaragua                      | 5,737,723     | 3,947           | 1.5         | 23.0        | 6.2         | 1.3          | 31.9        | 2.2         | 26.6        | 2.1         | 63.0        | 1.8         | 56.4       |                                         |                 |                 |
|                                                     | Panama                         | 3,643,222     | 15,312          | 1.2         | 19.1        | —           | 1.7          | 32.0        | 2.1         | 26.9        | 2.4         | 63.0        | 1.6         | 58.0       |                                         |                 |                 |
|                                                     | Paraguay                       | 6,209,877     | 7,142           | 2.6         | 10.9        | 11.7        | 1.8          | 26.9        | 2.1         | 28.8        | 2.1         | 54.8        | 1.2         | 55.4       |                                         |                 |                 |
|                                                     | Peru                           | 29,373,646    | 9,755           | 0.6         | 14.6        | 8.8         | 0.8          | 27.9        | 1.3         | 26.2        | 1.4         | 61.6        | 0.9         | 56.5       |                                         |                 |                 |
| Saint Lucia                                         | 172,580                        | 11,879        | 3.7             | 2.5         | 6.3         | 4.2         | 24.6         | 4.4         | 22.6        | 3.5         | 58.1        | 4.8         | 40.7        |            |                                         |                 |                 |
| Suriname                                            | 526,103                        | 13,924        | 5.0             | 8.8         | 4.0         | 3.8         | 30.1         | 3.3         | 32.2        | 2.8         | 66.1        | 3.2         | 55.1        |            |                                         |                 |                 |
| Venezuela (Bolivarian Republic of)                  | 29,028,033                     | 16,210        | 4.1             | 13.4        | 6.4         | 1.4         | 35.0         | 1.7         | 33.1        | 1.6         | 65.5        | 0.9         | 64.7        |            |                                         |                 |                 |
| <b>Region Total: Latin America &amp; Caribbean</b>  | <b>569,452,440</b>             | —             | <b>1.6</b>      | <b>12.0</b> | <b>6.7</b>  | <b>1.8</b>  | <b>29.8</b>  | <b>2.2</b>  | <b>31.0</b> | <b>2.3</b>  | <b>61.7</b> | <b>1.4</b>  | <b>60.5</b> | <b>1</b>   | <b>1</b>                                | <b>1</b>        |                 |
| Middle East & North Africa                          | Algeria                        | 36,117,637    | 12,610          | 4.1         | 11.7        | 12.4        | 4.9          | 30.0        | 6.9         | 31.2        | 3.3         | 68.1        | 3.3         | 59.7       |                                         |                 |                 |
|                                                     | Djibouti                       | 851,146       | 1,326           | 21.5        | 33.5        | 8.1         | 3.6          | 21.3        | 7.4         | 12.9        | 7.1         | 46.1        | 8.5         | 33.6       | HI                                      | HI              | HI              |
|                                                     | Egypt                          | 84,107,606    | 9,658           | 9.5         | 22.3        | 15.7        | 2.0          | 37.2        | 3.5         | 35.8        | 1.0         | 71.3        | 1.5         | 59.0       |                                         |                 |                 |
|                                                     | Iran (Islamic Republic of)     | 74,567,511    | 17,580          | 4.0         | 6.8         | —           | 7.3          | 25.0        | 9.7         | 26.1        | 3.5         | 67.4        | 3.1         | 59.5       |                                         |                 |                 |
|                                                     | Iraq                           | 30,762,701    | 12,460          | 7.4         | 22.6        | 11.8        | 4.0          | 31.6        | 6.4         | 31.9        | 2.0         | 70.0        | 2.0         | 62.9       |                                         |                 |                 |
|                                                     | Jordan                         | 7,182,390     | 9,281           | 2.4         | 7.8         | 4.7         | 3.4          | 30.6        | 4.5         | 31.1        | 1.2         | 74.2        | 0.8         | 68.9       |                                         |                 |                 |
|                                                     | Lebanon                        | 4,337,141     | 16,119          | 6.6         | 16.5        | 16.7        | 4.5          | 30.4        | 5.5         | 36.6        | 2.2         | 71.1        | 1.1         | 68.8       |                                         |                 |                 |
|                                                     | Libya                          | 6,169,140     | 12,121          | 6.5         | 21.0        | 22.4        | 4.7          | 31.3        | 6.6         | 33.5        | 1.7         | 72.0        | 1.8         | 65.3       |                                         |                 |                 |
|                                                     | Morocco                        | 32,409,639    | 29,031          | 2.3         | 14.9        | 10.7        | 5.0          | 27.1        | 7.7         | 27.0        | 3.1         | 66.0        | 2.6         | 58.3       |                                         |                 |                 |
|                                                     | Syrian Arab Republic (The)     | 21,018,834    | 6,313           | 11.5        | 27.5        | 17.9        | 5.2          | 27.7        | 7.1         | 28.8        | 2.5         | 67.4        | 2.2         | 59.1       |                                         |                 |                 |
| Tunisia                                             | 10,639,931                     | 10,225        | 2.8             | 10.1        | 14.3        | 5.1         | 25.9         | 7.9         | 24.0        | 3.0         | 67.8        | 2.8         | 59.0        |            |                                         |                 |                 |
| Yemen                                               | 23,606,779                     | 4,388         | 16.3            | 46.5        | 2.0         | 10.2        | 20.7         | 16.7        | 19.2        | 7.6         | 55.1        | 5.0         | 45.7        | HI         | HI                                      | HI              |                 |
| <b>Region Total: Middle East &amp; North Africa</b> | <b>331,770,455</b>             | —             | <b>7.0</b>      | <b>18.2</b> | <b>10.0</b> | <b>5.0</b>  | <b>29.7</b>  | <b>7.4</b>  | <b>29.7</b> | <b>2.8</b>  | <b>67.9</b> | <b>2.6</b>  | <b>58.9</b> | <b>2</b>   | <b>2</b>                                | <b>2</b>        |                 |
| South Asia                                          | Afghanistan                    | 28,803,167    | 1,582           | 9.5         | 40.9        | 5.4         | 10.9         | 9.8         | 23.1        | 8.9         | 15.6        | 27.1        | 16.7        | 20.5       |                                         |                 | HI              |
|                                                     | Bangladesh                     | 152,149,102   | 2,393           | 14.3        | 36.1        | 1.4         | 13.6         | 8.7         | 22.3        | 9.3         | 22.8        | 23.0        | 19.7        | 18.7       |                                         |                 | HI              |
|                                                     | Bhutan                         | 727,641       | 6,290           | 5.9         | 33.6        | 7.6         | 11.5         | 9.5         | 19.7        | 10.8        | 10.4        | 30.7        | 10.7        | 26.2       |                                         | HI              | HI              |
|                                                     | India                          | 1,230,980,691 | 4,316           | 21.0        | 38.4        | 3.8         | 22.7         | 6.1         | 30.7        | 7.5         | 23.7        | 22.4        | 22.6        | 18.5       |                                         |                 | HI              |
|                                                     | Maldives                       | 367,000       | 11,763          | 10.2        | 20.3        | 6.5         | 13.3         | 14.2        | 14.1        | 19.5        | 8.2         | 35.4        | 9.5         | 28.0       |                                         |                 | HI              |
|                                                     | Nepal                          | 27,023,137    | 1,946           | 12.8        | 40.8        | 1.6         | 10.3         | 7.8         | 21.1        | 7.2         | 17.2        | 23.7        | 15.6        | 19.9       |                                         |                 | HI              |
|                                                     | Pakistan                       | 170,560,182   | 4,197           | 10.5        | 45.0        | 4.8         | 15.3         | 9.1         | 23.1        | 10.1        | 14.4        | 32.4        | 14.8        | 26.7       |                                         | HI              | HI              |
|                                                     | Sri Lanka                      | 20,119,000    | 8,357           | 21.4        | 14.7        | 0.6         | 13.4         | 11.7        | 16.6        | 13.9        | 12.5        | 28.3        | 14.8        | 19.4       |                                         |                 | HI              |
| <b>Region Total: South Asia</b>                     | <b>1,630,729,920</b>           | —             | <b>18.9</b>     | <b>38.7</b> | <b>3.6</b>  | <b>20.5</b> | <b>6.9</b>   | <b>28.6</b> | <b>8.0</b>  | <b>22.3</b> | <b>23.7</b> | <b>21.2</b> | <b>19.5</b> | <b>0</b>   | <b>2</b>                                | <b>7</b>        |                 |
| Sub-Saharan Africa                                  | Angola                         | 23,369,131    | 5,778           | 4.9         | 37.6        | 3.3         | 5.2          | 14.8        | 11.2        | 6.9         | 10.6        | 36.1        | 15.9        | 20.3       |                                         | HI              | HI              |
|                                                     | Benin                          | 9,199,259     | 1,782           | 4.5         | 34.0        | 1.7         | 3.8          | 15.5        | 9.8         | 7.0         | 8.4         | 38.6        | 10.3        | 22.0       |                                         | HI              | HI              |
|                                                     | Botswana                       | 2,014,866     | 13,064          | 7.2         | 31.4        | 11.2        | 2.9          | 24.6        | 9.6         | 10.4        | 6.2         | 58.3        | 11.6        | 30.8       | HI                                      | HI              | HI              |
|                                                     | Burkina Faso                   | 15,605,217    | 1,395           | 7.6         | 27.3        | 1.2         | 5.6          | 10.1        | 9.9         | 5.1         | 12.5        | 30.3        | 10.4        | 16.7       |                                         |                 | HI              |
|                                                     | Burundi                        | 8,766,930     | 748             | 6.1         | 57.5        | 2.9         | 4.8          | 14.2        | 9.7         | 6.2         | 10.9        | 31.1        | 14.0        | 14.5       |                                         | HI              | HI              |
|                                                     | Cabo Verde                     | 502,384       | 5,710           | 6.9         | 21.4        | —           | 4.1          | 16.3        | 9.2         | 8.6         | 6.9         | 42.8        | 8.2         | 28.5       |                                         |                 | HI              |
|                                                     | Cameroon                       | 19,970,495    | 2,871           | 5.2         | 31.7        | 6.7         | 3.1          | 17.4        | 7.8         | 7.9         | 6.0         | 43.0        | 7.0         | 26.2       | HI                                      | HI              | HI              |
|                                                     | Central African Republic (The) | 4,448,525     | 863             | 7.4         | 40.7        | 1.8         | 5.2          | 14.5        | 11.3        | 6.6         | 12.0        | 34.4        | 17.2        | 19.1       |                                         | HI              | HI              |
|                                                     | Chad                           | 11,887,202    | 1,886           | 13.0        | 39.9        | 2.5         | 5.8          | 11.8        | 10.9        | 5.4         | 13.0        | 30.9        | 12.9        | 16.6       |                                         | HI              | HI              |
|                                                     | Comoros (The)                  | 689,692       | 1,384           | 11.1        | 32.1        | 10.9        | 4.0          | 16.9        | 9.0         | 7.3         | 8.2         | 36.9        | 11.6        | 19.0       |                                         | HI              | HI              |
|                                                     | Congo (The)                    | 4,386,693     | 5,081           | 8.2         | 21.2        | 5.9         | 4.7          | 13.7        | 9.9         | 7.8         | 11.1        | 38.7        | 14.5        | 25.2       |                                         |                 | HI              |
| Côte D'Ivoire                                       | 20,401,331                     | 2,636         | 7.6             | 29.6        | 3.2         | 2.8         | 16.9         | 8.1         | 8.8         | 7.3         | 40.8        | 7.9         | 25.5        |            |                                         | HI              |                 |

Continued...

| World Bank Region | Country                                 | Population         | GDP per capita* | Kids (0-4) |             |            | Girls (5-18) |             | Boys (5-18) |            | Women (19+) |             | Men (19+)   |             | Double burden based on anthropometry*** |                 |                 |
|-------------------|-----------------------------------------|--------------------|-----------------|------------|-------------|------------|--------------|-------------|-------------|------------|-------------|-------------|-------------|-------------|-----------------------------------------|-----------------|-----------------|
|                   |                                         |                    |                 | Wasting    | Stunting    | Overweight | Wasting      | Overweight  | Wasting     | Overweight | Thin        | Overweight  | Thin        | Overweight  | >40% overweight                         | >30% overweight | >20% overweight |
|                   | Democratic Rep. of the Congo (The)      | 64,523,263         | 647             | 8.1        | 42.6        | 4.4        | 5.7          | 14.0        | 13.0        | 6.1        | 12.9        | 33.2        | 18.5        | 18.7        |                                         | HI              | HI              |
|                   | Equatorial Guinea                       | 951,104            | 33,041          | 3.1        | 26.2        | 9.7        | 5.2          | 14.6        | 11.3        | 6.6        | 9.8         | 36.7        | 16.2        | 19.5        |                                         |                 |                 |
|                   | Eritrea                                 | 4,390,840          | 1,388           | 15.3       | 50.3        | 1.9        | 5.9          | 15.2        | 10.5        | 6.3        | 16.6        | 29.3        | 17.5        | 15.4        |                                         |                 | HI              |
|                   | Ethiopia                                | 87,702,670         | 1,052           | 9.9        | 38.4        | 2.8        | 7.2          | 12.5        | 13.4        | 4.6        | 14.2        | 29.0        | 16.7        | 14.0        |                                         |                 | HI              |
|                   | Gabon                                   | 1,640,210          | 15,045          | 3.4        | 17.5        | 7.7        | 3.3          | 19.5        | 8.6         | 11.5       | 6.5         | 48.0        | 10.6        | 35.1        |                                         |                 |                 |
|                   | Gambia (The)                            | 1,692,149          | 1,611           | 11.1       | 25.0        | 3.2        | 4.9          | 15.1        | 9.5         | 8.1        | 9.2         | 40.2        | 10.0        | 25.5        |                                         |                 |                 |
|                   | Ghana                                   | 24,512,104         | 2,997           | 4.7        | 18.8        | 2.6        | 3.2          | 15.1        | 9.0         | 6.3        | 6.8         | 42.3        | 10.0        | 23.0        |                                         |                 |                 |
|                   | Guinea                                  | 10,794,170         | 1,542           | 9.9        | 31.3        | 3.8        | 4.7          | 13.4        | 9.8         | 5.5        | 9.8         | 35.4        | 11.2        | 19.5        |                                         | HI              | HI              |
|                   | Guinea-Bissau                           | 1,555,880          | 1,372           | 6.0        | 27.6        | 2.3        | 4.2          | 14.5        | 9.9         | 7.1        | 8.7         | 38.5        | 9.9         | 23.1        |                                         |                 |                 |
|                   | Kenya                                   | 41,350,152         | 2,426           | 4.0        | 26.0        | 4.1        | 4.7          | 16.2        | 10.5        | 6.2        | 9.4         | 35.5        | 13.7        | 16.8        |                                         |                 |                 |
|                   | Lesotho                                 | 2,040,551          | 2,318           | 2.8        | 33.2        | 7.4        | 1.6          | 24.7        | 9.1         | 6.2        | 4.3         | 55.3        | 11.5        | 22.0        | HI                                      | HI              | HI              |
|                   | Liberia                                 | 3,948,125          | 686             | 5.6        | 32.1        | 3.2        | 3.5          | 14.2        | 9.2         | 6.1        | 7.6         | 39.6        | 8.2         | 24.1        |                                         | HI              | HI              |
|                   | Madagascar                              | 21,151,640         | 1,358           | 21.7       | 49.2        | 10.4       | 5.3          | 13.4        | 8.8         | 7.9        | 14.4        | 30.7        | 13.9        | 18.5        |                                         | HI              | HI              |
|                   | Malawi                                  | 15,167,095         | 1,012           | 4.0        | 42.0        | 6.3        | 3.0          | 14.8        | 9.5         | 6.3        | 8.8         | 32.6        | 12.6        | 15.4        |                                         | HI              | HI              |
|                   | Mali                                    | 15,075,085         | 1,834           | 20.6       | 49.7        | 5.6        | 4.3          | 14.6        | 10.7        | 6.7        | 9.4         | 36.4        | 10.5        | 21.2        |                                         | HI              | HI              |
|                   | Mauritania                              | 3,609,543          | 3,250           | 14.8       | 27.9        | 1.3        | 4.2          | 17.4        | 11.0        | 9.0        | 7.5         | 43.8        | 9.4         | 27.0        |                                         |                 |                 |
|                   | Mauritius                               | 1,250,400          | 15,616          | 15.7       | 13.6        | 6.5        | 4.8          | 18.4        | 8.9         | 11.2       | 6.9         | 41.2        | 8.7         | 25.3        | HI                                      | HI              | HI              |
|                   | Mozambique                              | 24,221,405         | 899             | 6.1        | 43.1        | 7.9        | 2.8          | 17.0        | 4.2         | 7.8        | 9.7         | 34.8        | 12.2        | 18.7        |                                         | HI              | HI              |
|                   | Namibia                                 | 2,173,170          | 8,290           | 7.1        | 23.1        | 4.1        | 5.5          | 20.8        | 10.8        | 9.8        | 8.1         | 53.6        | 10.8        | 28.3        |                                         |                 |                 |
|                   | Niger (The)                             | 16,425,578         | 798             | 18.7       | 43.0        | 3.0        | 6.2          | 11.3        | 12.5        | 5.0        | 12.3        | 30.7        | 13.3        | 15.2        |                                         | HI              | HI              |
|                   | Nigeria                                 | 158,578,261        | 5,046           | 7.2        | 32.9        | 1.6        | 7.6          | 10.3        | 11.6        | 6.5        | 9.3         | 37.4        | 10.6        | 22.6        |                                         | HI              | HI              |
|                   | Rwanda                                  | 10,246,842         | 1,338           | 2.2        | 37.9        | 7.7        | 2.8          | 16.9        | 8.8         | 5.2        | 7.4         | 34.7        | 11.5        | 16.2        |                                         | HI              | HI              |
|                   | Sao Tome and Principe                   | 174,776            | 1,130           | 4.0        | 17.2        | 2.4        | 2.6          | 16.6        | 8.1         | 9.5        | 7.3         | 43.0        | 6.7         | 29.3        |                                         |                 |                 |
|                   | Senegal                                 | 12,916,229         | 2,588           | 7.8        | 20.5        | 1.0        | 6.3          | 13.4        | 12.4        | 5.7        | 10.3        | 37.1        | 12.2        | 20.3        |                                         |                 |                 |
|                   | Sierra Leone                            | 6,458,720          | 2,140           | 9.4        | 37.9        | 8.9        | 4.8          | 15.1        | 9.7         | 6.3        | 9.3         | 37.2        | 10.6        | 19.9        |                                         | HI              | HI              |
|                   | Somalia                                 | 12,053,223         | 1,176           | 15.0       | 25.3        | 3.0        | 4.3          | 17.2        | 8.7         | 8.4        | 9.1         | 37.2        | 11.7        | 21.1        |                                         | HI              | HI              |
|                   | South Africa                            | 50,979,432         | 11,647          | 4.7        | 23.9        | 10.9       | 3.4          | 29.4        | 6.0         | 20.2       | 2.7         | 67.2        | 6.2         | 42.0        |                                         |                 |                 |
|                   | Sudan (The)                             | 34,385,963         | 3,298           | 16.3       | 38.2        | 3.0        | 4.3          | 16.7        | 8.9         | 8.0        | 7.9         | 37.3        | 11.1        | 20.5        |                                         | HI              | HI              |
|                   | Swaziland                               | 1,202,843          | 7,149           | 2.0        | 25.5        | 9.0        | 1.9          | 25.0        | 6.2         | 8.3        | 4.9         | 54.3        | 9.4         | 23.1        |                                         |                 |                 |
|                   | Tanzania                                | 46,098,591         | 2,048           | 7.4        | 42.5        | 5.9        | 4.1          | 16.1        | 9.0         | 7.5        | 9.6         | 36.7        | 11.9        | 20.4        |                                         | HI              | HI              |
|                   | Togo                                    | 6,502,952          | 1,184           | 6.7        | 27.5        | 2.0        | 2.8          | 14.0        | 9.9         | 6.5        | 8.6         | 37.0        | 10.3        | 20.4        |                                         |                 |                 |
|                   | Uganda                                  | 33,915,133         | 1,485           | 6.2        | 35.4        | 6.1        | 2.9          | 16.0        | 8.1         | 4.5        | 9.9         | 31.9        | 11.9        | 14.3        |                                         | HI              | HI              |
|                   | Zambia                                  | 13,850,033         | 3,213           | 6.3        | 40.0        | 6.2        | 3.7          | 16.7        | 8.6         | 8.4        | 8.5         | 37.6        | 13.3        | 19.8        |                                         | HI              | HI              |
|                   | Zimbabwe                                | 14,086,317         | 1,445           | 4.9        | 31.0        | 8.4        | 1.9          | 22.3        | 9.1         | 6.5        | 4.6         | 54.5        | 10.7        | 23.1        | HI                                      | HI              | HI              |
|                   | <b>Region Total: Sub-Saharan Africa</b> | <b>866,866,174</b> | —               | <b>8.3</b> | <b>35.1</b> | <b>4.4</b> | <b>5.2</b>   | <b>15.0</b> | <b>10.2</b> | <b>7.3</b> | <b>9.7</b>  | <b>37.6</b> | <b>12.3</b> | <b>20.9</b> | <b>5</b>                                | <b>27</b>       | <b>29</b>       |

Data sources: UNICEF-WHO-The World Bank, 2017; NCD-RisC; and Stevens et al., 2013 supplemented for missing preschooler data with DHS measures. Most recent year of data for UNICEF, WHO, and World Bank is 2017.

\* GDP per capita based on PPP (current international \$) from World Bank Indicators

\*\* Prevalence of wasting, stunting or thinness exceed threshold and prevalence of overweight exceeds threshold

**Supplemental Table S3. Number of households with children and women, mean age for women, and GDP per capita (PPP) by country for earliest and latest survey years\***

| Region                                   | Country                  | Earliest year | Households N (#) earliest year  |                                |                                             |                    |                | Latest year | Households N (#) latest year    |                                |                                             |                    |                |
|------------------------------------------|--------------------------|---------------|---------------------------------|--------------------------------|---------------------------------------------|--------------------|----------------|-------------|---------------------------------|--------------------------------|---------------------------------------------|--------------------|----------------|
|                                          |                          |               | Households with children (0–4y) | Households with women (15–49y) | Households with children and women (15–49y) | Mean age for women | 1990 GDP (PPP) |             | Households with children (0–4y) | Households with women (15–49y) | Households with children and women (15–49y) | Mean age for women | 2010 GDP (PPP) |
| <b>East Asia &amp; Pacific</b>           | Cambodia                 | 2000          | 2762                            | 5045                           | 2454                                        | 29.95              | 265.81         | 2014        | 3614                            | 7973                           | 3426                                        | 30.53              | 795.17         |
|                                          | China                    | 1991          | 859                             | 2395                           | 739                                         | 35.16              | 314.43         | 2015        | 794                             | 3120                           | 555                                         | 38.74              | 4432.96        |
|                                          | Indonesia                | 1993          | 2170                            | 4551                           | 1826                                        | 32.96              | 620.72         | 2014        | 4721                            | 9059                           | 2962                                        | 31.71              | 2951.70        |
|                                          | Myanmar                  | —             | —                               | —                              | —                                           | —                  | —              | 2015        | 3410                            | 8929                           | 3242                                        | 31.81              | 3534.80        |
|                                          | Timor-Leste              | —             | —                               | —                              | —                                           | —                  | 425.49         | 2009        | 5263                            | 8503                           | 4793                                        | 28.91              | 765.95         |
|                                          | Vietnam                  | 1992          | 2047                            | 2101                           | 753                                         | 27.37              | 98.03          | 2002        | 9238                            | 27221                          | 6655                                        | 31.35              | 1224.31        |
| <b>Europe &amp; Central Asia</b>         | Albania                  | —             | —                               | —                              | —                                           | —                  | 638.89         | 2008        | 1262                            | 5424                           | 1217                                        | 31.80              | 3700.74        |
|                                          | Armenia                  | 2000          | 1157                            | 4237                           | 1098                                        | 31.42              | 636.68         | 2015        | 1272                            | 4420                           | 1223                                        | 31.66              | 3030.71        |
|                                          | Azerbaijan               | —             | —                               | —                              | —                                           | —                  | 1237.32        | 2006        | 1532                            | 5519                           | 1444                                        | 31.30              | 5843.17        |
|                                          | Kazakhstan               | 1995          | 647                             | 2723                           | 618                                         | 30.68              | 1647.46        | 1999        | 463                             | 1744                           | 448                                         | 31.25              | 9070.01        |
|                                          | Kyrgyz Republic          | 1997          | 842                             | 2625                           | 802                                         | 29.85              | 608.95         | 2012        | 2860                            | 5663                           | 2632                                        | 29.95              | 880.04         |
|                                          | Moldova                  | —             | —                               | —                              | —                                           | —                  | 972.09         | 2005        | 1225                            | 5628                           | 1182                                        | 31.34              | 1631.53        |
|                                          | Tajikistan               | —             | —                               | —                              | —                                           | —                  | 496.00         | 2012        | 244                             | 5485                           | 229                                         | 29.23              | 740.00         |
|                                          | Turkey                   | 1993          | 2412                            | 2330                           | 2198                                        | 27.93              | 2783.59        | 2003        | 2990                            | 2927                           | 2767                                        | 28.62              | 10049.77       |
| Uzbekistan                               | 1996                     | 920           | 2900                            | 873                            | 28.91                                       | 651.42             | —              | —           | —                               | —                              | —                                           | 1377.08            |                |
| <b>Latin America &amp; the Caribbean</b> | Bolivia                  | 1994          | 2547                            | 2273                           | 2149                                        | 28.64              | 731.04         | 2008        | 5880                            | 12299                          | 5488                                        | 29.66              | 1978.85        |
|                                          | Brazil                   | 1996          | 3189                            | 3122                           | 2911                                        | 28.21              | 3086.88        | 2013        | —                               | 21645                          | —                                           | 35.29              | 10992.94       |
|                                          | Colombia                 | 1995          | 3347                            | 3173                           | 3055                                        | 28.33              | 1212.96        | 2010        | 12840                           | 34233                          | 12050                                       | 29.65              | 6186.02        |
|                                          | Dominican Republic       | 1991          | 2235                            | 2066                           | 1907                                        | 27.63              | 983.18         | 2013        | 2581                            | 6685                           | 2421                                        | 30.24              | 5195.38        |
|                                          | Guatemala                | 1995          | 5370                            | 4771                           | 4631                                        | 28.90              | 857.34         | 2014        | 8664                            | 16459                          | 8151                                        | 28.89              | 2873.08        |
|                                          | Guyana                   | —             | —                               | —                              | —                                           | —                  | 547.06         | 2009        | 1272                            | 3438                           | 1174                                        | 30.65              | 2994.45        |
|                                          | Haiti                    | 1994          | 1861                            | 1762                           | 1610                                        | 30.10              | 477.94         | 2017        | 4250                            | 6043                           | 2688                                        | 28.56              | 663.91         |
|                                          | Honduras                 | 2005          | 6940                            | 13335                          | 6492                                        | 28.71              | 623.58         | 2011        | 7787                            | 15370                          | 7419                                        | 28.96              | 2018.75        |
|                                          | Mexico                   | 1988          | 5022                            | 9786                           | 4530                                        | 28.74              | 3116.12        | 2012        | 10658                           | 13690                          | 4382                                        | 34.04              | 9127.54        |
|                                          | Nicaragua                | 1998          | 4797                            | 8536                           | 4486                                        | 28.50              | 244.97         | 2001        | 4313                            | 8451                           | 4056                                        | 28.75              | 1455.84        |
| Peru                                     | 1992                     | 5454          | 4967                            | 4770                           | 29.50                                       | 1212.53            | 2012           | 7531        | 17314                           | 7242                           | 30.79                                       | 5283.22            |                |
| <b>Middle East &amp; North Africa</b>    | Egypt, Arab Rep.         | 1992          | 4905                            | 4494                           | 4397                                        | 29.87              | 758.76         | 2014        | 10958                           | 18432                          | 9872                                        | 33.75              | 2698.37        |
|                                          | Jordan                   | 1997          | 3389                            | 2996                           | 2840                                        | 30.76              | 1268.22        | 2012        | 4204                            | 6212                           | 3732                                        | 35.09              | 4370.00        |
|                                          | Morocco                  | 1992          | 3021                            | 2705                           | 2639                                        | 31.49              | 1032.75        | 2003        | 4233                            | 9595                           | 4007                                        | 29.79              | 2795.49        |
|                                          | Yemen, Rep.              | —             | —                               | —                              | —                                           | —                  | 472.64         | 2013        | 8874                            | 13836                          | 7964                                        | 27.19              | 1290.62        |
| <b>South Asia</b>                        | Bangladesh               | 1996          | 3887                            | 3862                           | 3555                                        | 25.79              | 286.24         | 2014        | 6048                            | 14235                          | 5814                                        | 31.36              | 674.93         |
|                                          | India                    | 1998          | 23147                           | 66015                          | 21535                                       | 31.63              | 373.79         | 2015        | 171135                          | 463872                         | 160623                                      | 30.24              | 1375.38        |
|                                          | Maldives                 | —             | —                               | —                              | —                                           | —                  | 980.02         | 2009        | 1897                            | 4031                           | 1782                                        | 33.24              | 6570.43        |
|                                          | Nepal                    | 1996          | 3200                            | 3169                           | 2929                                        | 26.99              | 190.11         | 2016        | 1825                            | 4373                           | 1749                                        | 29.50              | 534.52         |
| <b>Sub-Saharan Africa</b>                | Burkina Faso             | 1992          | 2728                            | 2766                           | 2490                                        | 29.44              | 332.62         | 2010        | 4149                            | 5197                           | 3809                                        | 28.90              | 535.89         |
|                                          | Burundi                  | —             | —                               | —                              | —                                           | —                  | 202.10         | 2010        | 2294                            | 2975                           | 1972                                        | 27.71              | 241.79         |
|                                          | Cameroon                 | 1998          | 1479                            | 1447                           | 1327                                        | 26.92              | 915.50         | 2011        | 3177                            | 4700                           | 2890                                        | 27.98              | 1144.25        |
|                                          | Central African Republic | 1994          | 1915                            | 1806                           | 1690                                        | 27.16              | 506.86         | —           | —                               | —                              | —                                           | —                  | 451.26         |
|                                          | Chad                     | 1996          | 3546                            | 3231                           | 3033                                        | 27.82              | 289.23         | 2014        | 6276                            | 7634                           | 5336                                        | 28.45              | 760.71         |
|                                          | Comoros                  | 1996          | 827                             | 767                            | 725                                         | 29.48              | 571.01         | 2012        | 1771                            | 3286                           | 1595                                        | 27.69              | 739.51         |

Continued...

| Region | Country               | Earliest year | Households N (#) earliest year  |                                |                                                    |                    | 1990 GDP (PPP) | Latest year | Households N (#) latest year    |                                |                                                    |                    |                |
|--------|-----------------------|---------------|---------------------------------|--------------------------------|----------------------------------------------------|--------------------|----------------|-------------|---------------------------------|--------------------------------|----------------------------------------------------|--------------------|----------------|
|        |                       |               | Households with children (0–4y) | Households with women (15–49y) | Households with children (0–4y) and women (15–49y) | Mean age for women |                |             | Households with children (0–4y) | Households with women (15–49y) | Households with children (0–4y) and women (15–49y) | Mean age for women | 2010 GDP (PPP) |
|        | Congo, Dem. Rep.      | 2007          | 2307                            | 3061                           | 2026                                               | 28.80              | 256.82         | 2013        | 5052                            | 6099                           | 4346                                               | 28.46              | 198.71         |
|        | Congo, Rep.           | 2005          | 2826                            | 4233                           | 2618                                               | 28.05              | 1171.56        | 2011        | 2982                            | 3839                           | 2718                                               | 28.74              | 2970.12        |
|        | Côte d'Ivoire         | 1994          | 2500                            | 2441                           | 2304                                               | 27.28              | 862.44         | 2011        | 2103                            | 2901                           | 1898                                               | 28.48              | 1161.26        |
|        | Ethiopia              | 2000          | 6372                            | 10258                          | 5721                                               | 28.14              | 249.98         | 2016        | 6402                            | 10940                          | 5764                                               | 28.28              | 320.38         |
|        | Gabon                 | 2000          | 2095                            | 2034                           | 1893                                               | 27.11              | 6406.90        | 2012        | 2191                            | 3428                           | 1976                                               | 28.94              | 8767.83        |
|        | Gambia                | —             | —                               | —                              | —                                                  | —                  | 900.00         | 2013        | 1631                            | 2111                           | 1525                                               | 27.46              | 1610.00        |
|        | Ghana                 | 1993          | 1735                            | 1681                           | 1601                                               | 28.75              | 398.09         | 2014        | 1985                            | 3457                           | 1803                                               | 29.92              | 1319.08        |
|        | Guinea                | 1999          | 2844                            | 2698                           | 2572                                               | 28.99              | 463.00         | 2012        | 2014                            | 2710                           | 1853                                               | 28.37              | 474.47         |
|        | Kenya                 | 1993          | 3290                            | 3136                           | 2900                                               | 28.68              | 365.60         | 2014        | 13570                           | 10783                          | 6020                                               | 29.00              | 794.77         |
|        | Lesotho               | 2004          | 1137                            | 2435                           | 1076                                               | 28.59              | 329.91         | 2014        | 1102                            | 2590                           | 1076                                               | 28.53              | 1003.70        |
|        | Liberia               | 2007          | 3103                            | 4519                           | 2766                                               | 29.69              | 180.72         | 2013        | 2177                            | 3143                           | 2020                                               | 28.79              | 323.65         |
|        | Madagascar            | 1997          | 2670                            | 2518                           | 2352                                               | 27.57              | 273.17         | 2003        | 3290                            | 5778                           | 2975                                               | 29.75              | 426.63         |
|        | Malawi                | 1992          | 2296                            | 2216                           | 1976                                               | 29.07              | 200.49         | 2015        | 4128                            | 6041                           | 3830                                               | 28.33              | 362.30         |
|        | Mali                  | 1995          | 4035                            | 3819                           | 3572                                               | 28.30              | 279.17         | 2013        | 2882                            | 3536                           | 2537                                               | 29.04              | 613.04         |
|        | Mozambique            | 1997          | 3092                            | 3025                           | 2827                                               | 27.31              | 181.83         | 2011        | 6595                            | 9416                           | 5927                                               | 28.90              | 393.72         |
|        | Namibia               | 1992          | 1647                            | 1764                           | 1520                                               | 29.08              | 1661.19        | 2013        | 1379                            | 3255                           | 1322                                               | 33.20              | 4875.97        |
|        | Niger                 | 1992          | 2877                            | 2775                           | 2537                                               | 27.96              | 318.52         | 2012        | 2916                            | 3381                           | 2552                                               | 29.10              | 348.80         |
|        | Nigeria               | 2003          | 2987                            | 4660                           | 2654                                               | 28.09              | 291.87         | 2013        | 16545                           | 24707                          | 14581                                              | 29.04              | 1443.21        |
|        | Rwanda                | 2000          | 4368                            | 6676                           | 3876                                               | 28.22              | 358.70         | 2014        | 2764                            | 4602                           | 2554                                               | 28.71              | 529.41         |
|        | Sao Tome and Principe | —             | —                               | —                              | —                                                  | —                  | 660.62         | 2008        | 1239                            | 1766                           | 1081                                               | 29.29              | 1215.49        |
|        | Senegal               | 1992          | 2195                            | 2035                           | 1965                                               | 29.32              | 789.42         | 2010        | 1878                            | 2384                           | 1771                                               | 28.02              | 1033.91        |
|        | Sierra Leone          | 2008          | 1597                            | 2484                           | 1461                                               | 29.60              | 163.16         | 2013        | 3212                            | 4800                           | 3002                                               | 28.83              | 325.48         |
|        | Swaziland             | —             | —                               | —                              | —                                                  | —                  | 1292.06        | 2006        | 1489                            | 3037                           | 1423                                               | 27.92              | 3503.16        |
|        | Tanzania              | 1991          | 4124                            | 3886                           | 3641                                               | 28.59              | 171.91         | 2015        | 5979                            | 8753                           | 5527                                               | 28.91              | 526.56         |
|        | Togo                  | 1998          | 2964                            | 2845                           | 2731                                               | 29.18              | 444.26         | 2013        | 2156                            | 3136                           | 1964                                               | 29.47              | 529.65         |
|        | Uganda                | 1995          | 3368                            | 3033                           | 2844                                               | 27.21              | 243.19         | 2016        | 3006                            | 4205                           | 2701                                               | 28.21              | 514.51         |
|        | Zambia                | 1992          | 3165                            | 2914                           | 2724                                               | 27.86              | 418.37         | 2014        | 8123                            | 11114                          | 7446                                               | 28.48              | 1252.49        |
|        | Zimbabwe              | 1994          | 1865                            | 1839                           | 1711                                               | 27.51              | 839.01         | 2015        | 3933                            | 6931                           | 3734                                               | 28.63              | 591.29         |

\* All data are from the Demographic and Health Surveys (DHS, <https://dhsprogram.com/>) with the exceptions of China (China Health and Nutrition Survey), Indonesia (Indonesian Family Life Survey), Mexico (Mexico's National Survey of Health and Nutrition), Brazil (Brazilian National Health Survey), and Vietnam (Vietnam Living Standards Survey).

**Supplemental Table S4. Prevalence\* of household double burdens for children with underweight (ages 0–4 years) and women with overweight (ages 15–49 years) and annualized change in prevalence for earliest to latest survey years**

| Region                        | Country                  | Overweight and stunting in a single child |             |                   | Woman with overweight and child with wasting |             |                   | Woman with overweight and child with stunting |             |                   | Woman with thinness and child with overweight |             |                   | Total double burden: Woman or child with overweight and child with wasting/stunting or woman with thinness |             |                   |
|-------------------------------|--------------------------|-------------------------------------------|-------------|-------------------|----------------------------------------------|-------------|-------------------|-----------------------------------------------|-------------|-------------------|-----------------------------------------------|-------------|-------------------|------------------------------------------------------------------------------------------------------------|-------------|-------------------|
|                               |                          | Earliest year                             | Latest year | Annualized change | Earliest year                                | Latest year | Annualized change | Earliest year                                 | Latest year | Annualized change | Earliest year                                 | Latest year | Annualized change | Earliest year                                                                                              | Latest year | Annualized change |
| East Asia & Pacific           | Cambodia                 | 5.49                                      | 1.85        | -0.26             | 0.38                                         | 2.19        | 0.129             | 2.44                                          | 6.67        | 0.302             | 1.39                                          | 0.15        | -0.09             | 7.93                                                                                                       | 10.32       | 0.17              |
|                               | China                    | 3.88                                      | 8.33        | 0.19              | 0.16                                         | 0.74        | 0.024             | 3.59                                          | 4.90        | 0.055             | 0.16                                          | 3.99        | 0.16              | 9.89                                                                                                       | 15.57       | 0.24              |
|                               | Indonesia                | 2.87                                      | 4.30        | 0.07              | 1.42                                         | 2.97        | 0.074             | 6.47                                          | 15.14       | 0.413             | 0.60                                          | 0.79        | 0.01              | 9.16                                                                                                       | 20.06       | 0.52              |
|                               | Myanmar                  | —                                         | 0.96        | —                 | —                                            | 2.12        | —                 | —                                             | 6.09        | —                 | —                                             | 0.14        | —                 | —                                                                                                          | 9.07        | —                 |
|                               | Timor-Leste              | —                                         | 8.90        | —                 | —                                            | 1.06        | —                 | —                                             | 3.73        | —                 | —                                             | 3.41        | —                 | —                                                                                                          | 14.79       | —                 |
|                               | Vietnam                  | 3.03                                      | 0.97        | -0.21             | 0.07                                         | 0.44        | 0.037             | 0.45                                          | 1.08        | 0.063             | 0.73                                          | 0.56        | -0.02             | 1.95                                                                                                       | 2.78        | 0.08              |
| Eastern Europe & Central Asia | Albania                  | —                                         | 16.18       | —                 | —                                            | 4.17        | —                 | —                                             | 12.69       | —                 | —                                             | 1.46        | —                 | —                                                                                                          | 23.59       | —                 |
|                               | Armenia                  | 5.97                                      | 5.15        | -0.05             | 0.82                                         | 1.43        | 0.041             | 8.32                                          | 5.83        | -0.166            | 0.83                                          | 0.66        | -0.01             | 15.09                                                                                                      | 10.35       | -0.32             |
|                               | Azerbaijan               | —                                         | 14.85       | —                 | —                                            | 6.33        | —                 | —                                             | 20.66       | —                 | —                                             | 0.78        | —                 | —                                                                                                          | 34.74       | —                 |
|                               | Kazakhstan               | 1.86                                      | 1.47        | -0.10             | 3.64                                         | 0.27        | -0.841            | 8.67                                          | 1.93        | -1.686            | 0.31                                          | 0.34        | 0.01              | 12.60                                                                                                      | 6.05        | -1.64             |
|                               | Kyrgyz Republic          | 4.20                                      | 5.32        | 0.08              | 0.50                                         | 1.09        | 0.040             | 10.71                                         | 8.22        | -0.166            | 0.25                                          | 0.54        | 0.02              | 17.83                                                                                                      | 12.78       | -0.34             |
|                               | Moldova                  | —                                         | 2.98        | —                 | —                                            | 1.62        | —                 | —                                             | 4.40        | —                 | —                                             | 0.24        | —                 | —                                                                                                          | 7.76        | —                 |
|                               | Tajikistan               | —                                         | 7.39        | —                 | —                                            | 9.16        | —                 | —                                             | 14.48       | —                 | —                                             | 0.37        | —                 | —                                                                                                          | 23.64       | —                 |
|                               | Turkey                   | 2.55                                      | 1.67        | -0.09             | 2.06                                         | 0.34        | -0.172            | 14.08                                         | 9.54        | -0.454            | 0.05                                          | 0.04        | 0.00              | 16.84                                                                                                      | 10.62       | -0.62             |
|                               | Uzbekistan               | 17.22                                     | —           | —                 | 1.94                                         | —           | —                 | 15.25                                         | —           | —                 | 4.02                                          | —           | —                 | 33.09                                                                                                      | —           | —                 |
| Latin America & the Caribbean | Bolivia                  | 4.90                                      | 3.85        | -0.08             | 2.23                                         | 1.19        | -0.074            | 12.35                                         | 15.91       | 0.255             | 0.27                                          | 0.02        | -0.02             | 16.42                                                                                                      | 18.38       | 0.14              |
|                               | Brazil                   | 1.43                                      | —           | —                 | 1.11                                         | —           | —                 | 4.15                                          | —           | —                 | 0.31                                          | —           | —                 | 6.52                                                                                                       | —           | —                 |
|                               | Colombia                 | 1.32                                      | 0.67        | -0.04             | 0.87                                         | 0.33        | -0.036            | 8.92                                          | 5.63        | -0.219            | 0.08                                          | 0.07        | 0.00              | 10.26                                                                                                      | 6.95        | -0.22             |
|                               | Dominican Republic       | 2.28                                      | 1.63        | -0.03             | 0.70                                         | 2.40        | 0.077             | 3.80                                          | 3.79        | 0.000             | 0.28                                          | 0.37        | 0.00              | 6.28                                                                                                       | 8.11        | 0.08              |
|                               | Guatemala                | 6.15                                      | 2.18        | -0.21             | 1.40                                         | 0.53        | -0.046            | 19.04                                         | 24.34       | 0.279             | 0.27                                          | 0.09        | -0.01             | 24.68                                                                                                      | 26.03       | 0.07              |
|                               | Guyana                   | —                                         | 5.79        | —                 | —                                            | 1.87        | —                 | —                                             | 11.81       | —                 | —                                             | 1.83        | —                 | —                                                                                                          | 17.56       | —                 |
|                               | Haiti                    | 4.68                                      | 1.78        | -0.13             | 1.43                                         | 1.63        | 0.009             | 3.77                                          | 6.48        | 0.118             | 1.40                                          | 0.36        | -0.05             | 8.45                                                                                                       | 10.29       | 0.08              |
|                               | Honduras                 | 1.59                                      | 0.89        | -0.12             | 0.71                                         | 0.94        | 0.037             | 12.77                                         | 13.71       | 0.156             | 0.14                                          | 0.15        | 0.00              | 14.77                                                                                                      | 15.33       | 0.09              |
|                               | Mexico                   | 3.75                                      | 1.49        | -0.09             | 2.35                                         | 0.81        | -0.064            | 8.79                                          | 7.83        | -0.040            | 0.59                                          | 0.07        | -0.02             | 14.27                                                                                                      | 8.83        | -0.23             |
|                               | Nicaragua                | 4.96                                      | 3.92        | -0.35             | 2.96                                         | 1.10        | -0.621            | 14.19                                         | 12.77       | -0.472            | 0.30                                          | 0.19        | -0.04             | 20.02                                                                                                      | 15.84       | -1.39             |
|                               | Peru                     | 5.14                                      | 0.63        | -0.23             | 0.80                                         | 0.29        | -0.026            | 14.88                                         | 11.24       | -0.182            | 0.08                                          | 0.18        | 0.00              | 19.08                                                                                                      | 12.08       | -0.35             |
| Middle East & North Africa    | Egypt, Arab Rep.         | 10.13                                     | 12.15       | 0.09              | 3.46                                         | 10.21       | 0.307             | 19.84                                         | 21.10       | 0.057             | 0.10                                          | 0.00        | 0.00              | 28.20                                                                                                      | 32.84       | 0.21              |
|                               | Jordan                   | 2.15                                      | 1.10        | -0.07             | 2.01                                         | 2.60        | 0.040             | 9.90                                          | 7.49        | -0.160            | 0.03                                          | 0.09        | 0.00              | 11.51                                                                                                      | 10.42       | -0.07             |
|                               | Morocco                  | 6.12                                      | 8.47        | 0.21              | 0.69                                         | 5.66        | 0.453             | 9.93                                          | 10.72       | 0.072             | 0.43                                          | 0.73        | 0.03              | 14.80                                                                                                      | 22.37       | 0.69              |
|                               | Yemen, Rep.              | —                                         | 3.45        | —                 | —                                            | 5.15        | —                 | —                                             | 13.29       | —                 | —                                             | 0.82        | —                 | —                                                                                                          | 19.29       | —                 |
| South Asia                    | Bangladesh               | 2.84                                      | 1.46        | -0.08             | 0.69                                         | 2.45        | 0.098             | 1.05                                          | 5.42        | 0.243             | 1.17                                          | 0.41        | -0.04             | 3.52                                                                                                       | 9.01        | 0.31              |
|                               | India                    | 4.41                                      | 2.63        | -0.10             | 0.95                                         | 4.10        | 0.185             | 3.17                                          | 6.43        | 0.191             | 1.67                                          | 0.74        | -0.05             | 8.21                                                                                                       | 12.16       | 0.23              |
|                               | Maldives                 | —                                         | 2.51        | —                 | —                                            | 9.15        | —                 | —                                             | 11.11       | —                 | —                                             | 0.51        | —                 | —                                                                                                          | 19.85       | —                 |
|                               | Nepal                    | 0.76                                      | 0.57        | -0.01             | 0.09                                         | 1.67        | 0.079             | 0.79                                          | 5.51        | 0.236             | 0.12                                          | 0.29        | 0.01              | 1.65                                                                                                       | 7.91        | 0.31              |
| Sub-Saharan Africa            | Burkina Faso             | 3.33                                      | 3.29        | 0.00              | 1.44                                         | 1.59        | 0.008             | 3.57                                          | 3.40        | -0.009            | 1.11                                          | 0.79        | -0.02             | 7.13                                                                                                       | 7.34        | 0.01              |
|                               | Burundi                  | —                                         | 3.36        | —                 | —                                            | 0.92        | —                 | —                                             | 4.31        | —                 | —                                             | 0.37        | —                 | —                                                                                                          | 7.63        | —                 |
|                               | Cameroon                 | 4.98                                      | 5.20        | 0.02              | 1.51                                         | 2.06        | 0.043             | 6.86                                          | 11.73       | 0.374             | 0.53                                          | 0.35        | -0.01             | 12.47                                                                                                      | 17.68       | 0.40              |
|                               | Central African Republic | 3.33                                      | —           | —                 | 0.74                                         | —           | —                 | 3.13                                          | —           | —                 | 0.56                                          | —           | —                 | —                                                                                                          | 7.62        | —                 |
|                               | Chad                     | 3.33                                      | 2.86        | -0.03             | 0.92                                         | 1.63        | 0.039             | 2.94                                          | 5.61        | 0.148             | 0.54                                          | 0.66        | 0.01              | 6.96                                                                                                       | 10.19       | 0.18              |
|                               | Comoros                  | 3.76                                      | 10.52       | 0.42              | 2.56                                         | 9.22        | 0.416             | 6.90                                          | 16.75       | 0.616             | 0.58                                          | 0.89        | 0.02              | 12.55                                                                                                      | 28.58       | 1.00              |
|                               | Congo, Dem. Rep.         | 13.00                                     | 5.84        | -1.19             | 1.60                                         | 1.57        | -0.005            | 6.44                                          | 6.43        | -0.002            | 2.61                                          | 0.85        | -0.29             | 17.68                                                                                                      | 12.70       | -0.83             |
|                               | Congo, Rep.              | 8.04                                      | 2.68        | -0.89             | 2.81                                         | 1.85        | -0.160            | 10.30                                         | 4.34        | -0.993            | 1.34                                          | 0.75        | -0.10             | 17.97                                                                                                      | 8.90        | -1.51             |
|                               | Côte d'Ivoire            | 1.63                                      | 2.30        | 0.04              | 1.87                                         | 2.39        | 0.031             | 4.40                                          | 8.32        | 0.231             | 0.16                                          | 0.22        | 0.00              | 6.58                                                                                                       | 11.52       | 0.29              |
|                               | Ethiopia                 | 1.86                                      | 2.93        | 0.07              | 0.27                                         | 0.47        | 0.012             | 0.85                                          | 1.59        | 0.046             | 0.74                                          | 0.74        | 0.00              | 3.48                                                                                                       | 6.02        | 0.16              |
|                               | Gabon                    | 3.97                                      | 4.80        | 0.07              | 1.57                                         | 3.76        | 0.182             | 7.40                                          | 8.77        | 0.114             | 0.38                                          | 0.41        | 0.00              | 11.80                                                                                                      | 15.12       | 0.28              |
|                               | Gambia                   | —                                         | 5.93        | —                 | —                                            | 5.44        | —                 | —                                             | 10.31       | —                 | —                                             | —           | 2.20              | —                                                                                                          | 19.20       | —                 |
|                               | Ghana                    | 1.62                                      | 1.34        | -0.01             | 1.97                                         | 1.56        | -0.019            | 3.41                                          | 5.63        | 0.106             | 0.35                                          | 0.19        | -0.01             | 6.53                                                                                                       | 8.58        | 0.10              |

Continued...

| Region                    | Country               | Overweight and stunting in a single child |             |                   | Woman with overweight and child with wasting |             |                   | Woman with overweight and child with stunting |             |                   | Woman with thinness and child with overweight |             |                   | Total double burden: Woman or child with overweight and child with wasting/stunting or woman with thinness |             |                   |
|---------------------------|-----------------------|-------------------------------------------|-------------|-------------------|----------------------------------------------|-------------|-------------------|-----------------------------------------------|-------------|-------------------|-----------------------------------------------|-------------|-------------------|------------------------------------------------------------------------------------------------------------|-------------|-------------------|
|                           |                       | Earliest year                             | Latest year | Annualized change | Earliest year                                | Latest year | Annualized change | Earliest year                                 | Latest year | Annualized change | Earliest year                                 | Latest year | Annualized change | Earliest year                                                                                              | Latest year | Annualized change |
|                           | Guinea                | 4.94                                      | 3.57        | -0.11             | 1.83                                         | 2.52        | 0.053             | 4.99                                          | 8.45        | 0.266             | 0.82                                          | 0.33        | -0.04             | 10.76                                                                                                      | 13.56       | 0.22              |
|                           | Kenya                 | 4.38                                      | 2.06        | -0.11             | 0.66                                         | 1.01        | 0.017             | 6.13                                          | 7.97        | 0.088             | 0.60                                          | 0.50        | 0.00              | 10.53                                                                                                      | 10.78       | 0.01              |
|                           | Lesotho               | 7.04                                      | 4.35        | -0.27             | 3.29                                         | 2.09        | -0.120            | 22.35                                         | 15.98       | -0.638            | 0.18                                          | 0.15        | 0.00              | 28.31                                                                                                      | 20.08       | -0.82             |
|                           | Liberia               | 4.38                                      | 3.43        | -0.16             | 2.65                                         | 2.09        | -0.094            | 8.86                                          | 10.86       | 0.333             | 0.55                                          | 1.34        | 0.13              | 14.18                                                                                                      | 16.10       | 0.32              |
|                           | Madagascar            | 2.32                                      | 8.28        | 0.99              | 0.34                                         | 0.69        | 0.059             | 1.55                                          | 2.80        | 0.209             | 0.50                                          | 2.01        | 0.25              | 4.78                                                                                                       | 11.40       | 1.10              |
|                           | Malawi                | 9.89                                      | 3.15        | -0.29             | 0.79                                         | 0.76        | -0.001            | 5.64                                          | 6.55        | 0.039             | 1.00                                          | 0.15        | -0.04             | 15.35                                                                                                      | 9.55        | -0.25             |
|                           | Mali                  | 1.86                                      | 4.20        | 0.13              | 2.47                                         | 3.45        | 0.054             | 2.85                                          | 7.61        | 0.265             | 0.39                                          | 0.75        | 0.02              | 5.99                                                                                                       | 13.71       | 0.43              |
|                           | Mozambique            | 5.93                                      | 8.78        | 0.20              | 2.22                                         | 0.79        | -0.102            | 2.51                                          | 6.65        | 0.295             | 0.20                                          | 0.92        | 0.05              | 9.62                                                                                                       | 15.77       | 0.44              |
|                           | Namibia               | 4.36                                      | 2.59        | -0.08             | 3.27                                         | 3.49        | 0.011             | 9.49                                          | 7.69        | -0.086            | 1.89                                          | 0.66        | -0.06             | 15.73                                                                                                      | 13.94       | -0.09             |
| <b>Sub-Saharan Africa</b> | Niger                 | 2.26                                      | 4.20        | 0.10              | 2.24                                         | 4.57        | 0.117             | 4.43                                          | 8.93        | 0.225             | 0.88                                          | 0.34        | -0.03             | 7.83                                                                                                       | 14.68       | 0.34              |
| <i>(continued)</i>        | Nigeria               | 8.82                                      | 6.51        | -0.23             | 3.06                                         | 5.78        | 0.272             | 10.08                                         | 10.08       | 0.000             | 2.23                                          | 1.26        | -0.10             | 20.00                                                                                                      | 19.36       | -0.06             |
|                           | Rwanda                | 6.72                                      | 5.03        | -0.12             | 1.64                                         | 0.29        | -0.096            | 6.68                                          | 8.71        | 0.145             | 0.52                                          | 0.12        | -0.03             | 13.80                                                                                                      | 13.51       | -0.02             |
|                           | Sao Tome and Principe | —                                         | 12.12       | —                 | —                                            | 7.87        | —                 | —                                             | 10.77       | —                 | —                                             | 0.61        | —                 | —                                                                                                          | 26.96       | —                 |
|                           | Senegal               | 4.63                                      | 4.81        | 0.01              | 3.66                                         | 4.61        | 0.053             | 7.29                                          | 10.13       | 0.158             | 1.97                                          | 2.45        | 0.03              | 14.40                                                                                                      | 19.58       | 0.29              |
|                           | Sierra Leone          | 11.78                                     | 9.88        | -0.38             | 3.38                                         | 3.48        | 0.021             | 11.60                                         | 9.26        | -0.467            | 1.43                                          | 1.54        | 0.02              | 23.38                                                                                                      | 20.14       | -0.65             |
|                           | Swaziland             | —                                         | 6.29        | —                 | —                                            | 2.51        | —                 | —                                             | 20.13       | —                 | —                                             | 0.42        | —                 | —                                                                                                          | 24.87       | —                 |
|                           | Tanzania              | 6.26                                      | 2.77        | -0.14             | 1.23                                         | 1.41        | 0.008             | 5.48                                          | 10.48       | 0.209             | 0.45                                          | 0.26        | -0.01             | 11.29                                                                                                      | 14.05       | 0.12              |
|                           | Togo                  | 1.94                                      | 1.47        | -0.03             | 1.02                                         | 1.72        | 0.046             | 3.34                                          | 5.88        | 0.170             | 0.38                                          | 0.20        | -0.01             | 5.96                                                                                                       | 8.64        | 0.18              |
|                           | Uganda                | 4.63                                      | 2.04        | -0.12             | 0.30                                         | 0.72        | 0.020             | 4.52                                          | 6.72        | 0.105             | 0.38                                          | 0.10        | -0.01             | 9.35                                                                                                       | 9.47        | 0.00              |
|                           | Zambia                | 4.41                                      | 6.12        | 0.08              | 1.43                                         | 1.97        | 0.024             | 7.76                                          | 9.55        | 0.081             | 0.73                                          | 0.65        | 0.00              | 12.06                                                                                                      | 16.50       | 0.20              |
|                           | Zimbabwe              | 3.47                                      | 3.52        | 0.00              | 2.25                                         | 1.12        | -0.054            | 6.43                                          | 10.56       | 0.197             | 0.63                                          | 0.41        | -0.01             | 11.15                                                                                                      | 13.35       | 0.10              |

Data sources: All data are from the Demographic and Health Surveys (DHS, <https://dhsprogram.com/>) with the exceptions of China (China Health and Nutrition Survey), Indonesia (Indonesian Family Life Survey), Mexico (Mexico National Survey of Health and Nutrition), Brazil (Brazil National Health Survey), and Vietnam (Vietnam Living Standards Survey).

\* Nationally representative and regionally weighted

**Supplemental Table S5. Prevalence\* of wasting, stunting, and overweight or obesity for children (ages 0–4 years) and annualized change in prevalence from earliest to latest survey years\*\***

| Region                        | Country                  | Wasting prevalence |             |                   | Stunting prevalence |             |                   | Wasting or stunting prevalence |             |                   | Overweight or obesity |             |                   |
|-------------------------------|--------------------------|--------------------|-------------|-------------------|---------------------|-------------|-------------------|--------------------------------|-------------|-------------------|-----------------------|-------------|-------------------|
|                               |                          | Earliest year      | Latest year | Annualized change | Earliest year       | Latest year | Annualized change | Earliest year                  | Latest year | Annualized change | Earliest year         | Latest year | Annualized change |
| East Asia & Pacific           | Cambodia                 | 23.75              | 12.85       | -0.78             | 55.34               | 36.63       | -1.34             | 68.72                          | 44.06       | -1.76             | 6.43                  | 3.24        | -0.23             |
|                               | China                    | 2.94               | 4.57        | 0.07              | 36.67               | 17.13       | -0.81             | 38.43                          | 21.90       | -0.69             | 9.28                  | 23.39       | 0.59              |
|                               | Indonesia                | 12.69              | 9.92        | -0.13             | 51.87               | 35.69       | -0.77             | 59.13                          | 42.49       | -0.79             | 4.35                  | 9.03        | 0.22              |
|                               | Myanmar                  | —                  | 8.50        | —                 | —                   | 32.30       | —                 | —                              | 38.08       | —                 | —                     | 2.18        | —                 |
|                               | Timor-Leste              | —                  | 27.07       | —                 | —                   | 68.91       | —                 | —                              | 80.52       | —                 | —                     | 10.37       | —                 |
|                               | Vietnam                  | 8.65               | 9.39        | 0.07              | 67.56               | 33.66       | -3.39             | 70.10                          | 39.44       | -3.07             | 4.01                  | 2.23        | -0.18             |
| Eastern Europe & Central Asia | Albania                  | —                  | 12.09       | —                 | —                   | 27.09       | —                 | —                              | 38.25       | —                 | —                     | 29.23       | —                 |
|                               | Armenia                  | 3.29               | 5.62        | 0.16              | 20.02               | 11.88       | -0.54             | 23.00                          | 17.14       | -0.39             | 20.30                 | 17.17       | -0.21             |
|                               | Azerbaijan               | —                  | 9.44        | —                 | —                   | 33.22       | —                 | —                              | 40.22       | —                 | —                     | 19.97       | —                 |
|                               | Kazakhstan               | 9.21               | 3.14        | -1.52             | 23.25               | 16.32       | -1.73             | 30.52                          | 19.14       | -2.84             | 6.30                  | 7.14        | 0.21              |
|                               | Kyrgyz Republic          | 4.56               | 4.10        | -0.03             | 36.11               | 22.33       | -0.92             | 39.21                          | 25.38       | -0.92             | 11.30                 | 12.31       | 0.07              |
|                               | Moldova                  | —                  | 7.43        | —                 | —                   | 11.88       | —                 | —                              | 18.59       | —                 | —                     | 11.11       | —                 |
|                               | Tajikistan               | —                  | 18.96       | —                 | —                   | 39.62       | —                 | —                              | 51.60       | —                 | —                     | 10.09       | —                 |
|                               | Turkey                   | 5.50               | 1.40        | -0.41             | 27.49               | 17.21       | -1.03             | 30.51                          | 18.21       | -1.23             | 6.96                  | 11.46       | 0.45              |
| Uzbekistan                    | 15.53                    | —                  | —           | 42.80             | —                   | —           | 54.43             | —                              | —           | 26.07             | —                     | —           |                   |
| Latin America & the Caribbean | Bolivia                  | 6.82               | 2.24        | -0.33             | 37.90               | 30.80       | -0.51             | 41.68                          | 32.16       | -0.68             | 9.74                  | 11.79       | 0.15              |
|                               | Brazil                   | 4.05               | —           | —                 | 15.13               | —           | —                 | 18.28                          | —           | —                 | 8.00                  | —           | —                 |
|                               | Colombia                 | 2.44               | 1.24        | -0.08             | 22.93               | 13.87       | -0.60             | 24.38                          | 14.79       | -0.64             | 6.24                  | 6.01        | -0.02             |
|                               | Dominican Republic       | 3.60               | 2.97        | -0.03             | 25.09               | 8.68        | -0.75             | 27.21                          | 11.14       | -0.73             | 7.25                  | 10.10       | 0.13              |
|                               | Guatemala                | 6.73               | 1.08        | -0.30             | 63.06               | 49.67       | -0.70             | 64.95                          | 50.01       | -0.79             | 10.11                 | 6.82        | -0.17             |
|                               | Guyana                   | —                  | 7.54        | —                 | —                   | 25.09       | —                 | —                              | 31.06       | —                 | —                     | 13.43       | —                 |
|                               | Haiti                    | 14.39              | 5.33        | -0.39             | 47.33               | 24.90       | -0.98             | 53.03                          | 28.54       | -1.06             | 7.79                  | 4.99        | -0.12             |
|                               | Honduras                 | 2.26               | 1.75        | -0.09             | 32.45               | 24.79       | -1.28             | 34.04                          | 25.81       | -1.37             | 7.97                  | 6.92        | -0.17             |
|                               | Mexico                   | 8.65               | 1.60        | -0.29             | 30.92               | 13.79       | -0.71             | 36.77                          | 15.24       | -0.90             | 9.21                  | 9.13        | 0.00              |
|                               | Nicaragua                | 5.10               | 3.36        | -0.58             | 35.92               | 29.59       | -2.11             | 38.91                          | 31.61       | -2.43             | 11.40                 | 10.93       | -0.15             |
| Peru                          | 3.12                     | 0.84               | -0.11       | 42.74             | 19.66               | -1.15       | 44.34             | 20.15                          | -1.21       | 13.57             | 8.75                  | -0.24       |                   |
| Middle East & North Africa    | Egypt, Arab Rep.         | 6.55               | 13.54       | 0.32              | 40.45               | 27.52       | -0.59             | 44.50                          | 39.38       | -0.23             | 21.81                 | 21.46       | -0.02             |
|                               | Jordan                   | 3.92               | 4.03        | 0.01              | 16.29               | 10.78       | -0.37             | 19.09                          | 14.26       | -0.32             | 7.45                  | 7.13        | -0.02             |
|                               | Morocco                  | 4.45               | 14.53       | 0.92              | 38.73               | 27.53       | -1.02             | 40.76                          | 39.52       | -0.11             | 16.61                 | 17.95       | 0.12              |
|                               | Yemen, Rep.              | —                  | 24.72       | —                 | —                   | 56.93       | —                 | —                              | 67.06       | —                 | —                     | 4.58        | —                 |
| South Asia                    | Bangladesh               | 27.92              | 17.45       | -0.58             | 66.76               | 40.03       | -1.49             | 76.45                          | 49.82       | -1.48             | 3.64                  | 2.38        | -0.07             |
|                               | India                    | 23.93              | 27.93       | 0.24              | 57.18               | 44.40       | -0.75             | 67.75                          | 60.57       | -0.42             | 5.50                  | 3.77        | -0.10             |
|                               | Maldives                 | —                  | 14.85       | —                 | —                   | 23.08       | —                 | —                              | 33.90       | —                 | —                     | 8.62        | —                 |
|                               | Nepal                    | 17.89              | 12.75       | -0.26             | 62.02               | 40.76       | -1.06             | 67.81                          | 47.65       | -1.01             | 1.24                  | 1.62        | 0.02              |
| Sub-Saharan Africa            | Burkina Faso             | 25.28              | 24.50       | -0.04             | 54.56               | 45.55       | -0.50             | 64.27                          | 56.96       | -0.41             | 5.67                  | 4.90        | -0.04             |
|                               | Burundi                  | —                  | 8.96        | —                 | —                   | 67.65       | —                 | —                              | 69.95       | —                 | —                     | 4.39        | —                 |
|                               | Cameroon                 | 10.93              | 9.67        | -0.10             | 43.52               | 42.57       | -0.07             | 49.29                          | 46.50       | -0.21             | 10.80                 | 10.91       | 0.01              |
|                               | Central African Republic | 12.32              | —           | —                 | 46.84               | —           | —                 | 52.69                          | —           | —                 | 5.74                  | —           | —                 |
|                               | Chad                     | 25.49              | 21.75       | -0.21             | 59.66               | 53.93       | -0.32             | 68.97                          | 62.76       | -0.34             | 4.96                  | 4.99        | 0.00              |
|                               | Comoros                  | 13.96              | 19.09       | 0.32              | 43.65               | 39.18       | -0.28             | 50.30                          | 52.13       | 0.11              | 7.04                  | 16.97       | 0.62              |
|                               | Congo, Dem. Rep.         | 16.01              | 13.90       | -0.35             | 58.63               | 55.23       | -0.57             | 66.60                          | 61.75       | -0.81             | 15.61                 | 8.52        | -1.18             |
|                               | Congo, Rep.              | 11.61              | 8.01        | -0.60             | 37.44               | 29.30       | -1.36             | 45.24                          | 34.82       | -1.74             | 12.23                 | 5.11        | -1.19             |
|                               | Côte d'Ivoire            | 15.39              | 12.91       | -0.15             | 38.50               | 38.62       | 0.01              | 45.90                          | 47.13       | 0.07              | 4.09                  | 4.97        | 0.05              |
| Ethiopia                      | 18.38                    | 14.03              | -0.27       | 67.58             | 47.57               | -1.25       | 72.78             | 54.66                          | -1.13       | 3.17              | 4.74                  | 0.10        |                   |

Continued ...

| Region                            | Country               | Wasting prevalence |             |                   | Stunting prevalence |             |                   | Wasting or stunting prevalence |             |                   | Overweight or obesity |             |                   |
|-----------------------------------|-----------------------|--------------------|-------------|-------------------|---------------------|-------------|-------------------|--------------------------------|-------------|-------------------|-----------------------|-------------|-------------------|
|                                   |                       | Earliest year      | Latest year | Annualized change | Earliest year       | Latest year | Annualized change | Earliest year                  | Latest year | Annualized change | Earliest year         | Latest year | Annualized change |
| Sub-Saharan Africa<br>(continued) | Gabon                 | 7.20               | 5.96        | -0.10             | 35.42               | 22.30       | -1.09             | 39.39                          | 25.84       | -1.13             | 9.60                  | 12.69       | 0.26              |
|                                   | Gambia                | —                  | 22.94       | —                 | —                   | 38.04       | —                 | —                              | 51.16       | —                 | —                     | 8.52        | —                 |
|                                   | Ghana                 | 17.19              | 6.85        | -0.49             | 36.48               | 22.04       | -0.69             | 45.82                          | 26.40       | -0.92             | 3.88                  | 3.90        | 0.00              |
|                                   | Guinea                | 16.89              | 16.63       | -0.02             | 47.49               | 39.96       | -0.58             | 55.82                          | 49.23       | -0.51             | 8.40                  | 7.33        | -0.08             |
|                                   | Kenya                 | 10.90              | 5.70        | -0.25             | 50.24               | 30.92       | -0.92             | 54.34                          | 34.24       | -0.96             | 9.58                  | 6.03        | -0.17             |
|                                   | Lesotho               | 7.92               | 4.37        | -0.36             | 49.14               | 35.81       | -1.33             | 54.16                          | 38.63       | -1.55             | 11.06                 | 10.70       | -0.04             |
|                                   | Liberia               | 11.48              | 9.07        | -0.40             | 47.06               | 39.53       | -1.25             | 53.21                          | 44.36       | -1.48             | 7.11                  | 5.86        | -0.21             |
|                                   | Madagascar            | 12.20              | 21.74       | 1.59              | 59.99               | 61.79       | 0.30              | 63.57                          | 71.87       | 1.38              | 3.85                  | 10.43       | 1.10              |
|                                   | Malawi                | 10.24              | 3.96        | -0.27             | 66.69               | 42.03       | -1.07             | 69.70                          | 44.56       | -1.09             | 14.85                 | 6.35        | -0.37             |
|                                   | Mali                  | 34.68              | 20.58       | -0.78             | 42.39               | 49.71       | 0.41              | 62.03                          | 60.21       | -0.10             | 3.00                  | 5.62        | 0.15              |
|                                   | Mozambique            | 14.93              | 9.47        | -0.39             | 49.27               | 54.04       | 0.34              | 56.86                          | 59.16       | 0.16              | 7.92                  | 12.76       | 0.35              |
|                                   | Namibia               | 15.53              | 12.19       | -0.16             | 45.11               | 25.71       | -0.92             | 52.07                          | 34.23       | -0.85             | 8.50                  | 6.50        | -0.10             |
|                                   | Niger                 | 30.38              | 30.47       | 0.00              | 62.30               | 59.14       | -0.16             | 71.85                          | 70.46       | -0.07             | 3.69                  | 6.11        | 0.12              |
|                                   | Nigeria               | 19.03              | 27.94       | 0.89              | 54.52               | 47.46       | -0.71             | 63.00                          | 62.02       | -0.10             | 11.84                 | 8.75        | -0.31             |
|                                   | Rwanda                | 13.01              | 3.24        | -0.70             | 57.23               | 44.73       | -0.89             | 64.62                          | 46.59       | -1.29             | 10.34                 | 11.45       | 0.08              |
|                                   | Sao Tome and Principe | —                  | 16.62       | —                 | —                   | 36.84       | —                 | —                              | 50.42       | —                 | —                     | 18.26       | —                 |
|                                   | Senegal               | 18.29              | 19.70       | 0.08              | 50.57               | 44.03       | -0.36             | 56.91                          | 53.62       | -0.18             | 9.58                  | 7.43        | -0.12             |
|                                   | Sierra Leone          | 15.98              | 15.33       | -0.13             | 46.05               | 48.82       | 0.55              | 55.93                          | 57.26       | 0.26              | 17.42                 | 15.42       | -0.40             |
|                                   | Swaziland             | —                  | 4.54        | —                 | —                   | 34.62       | —                 | —                              | 38.06       | —                 | —                     | 15.86       | —                 |
|                                   | Tanzania              | 13.25              | 7.44        | -0.24             | 61.22               | 42.54       | -0.78             | 66.86                          | 46.20       | -0.86             | 9.64                  | 5.95        | -0.15             |
| Togo                              | 18.14                 | 9.90               | -0.55       | 34.70             | 32.92               | -0.12       | 45.49             | 37.93                          | -0.50       | 3.89              | 3.23                  | -0.04       |                   |
| Uganda                            | 10.14                 | 6.16               | -0.19       | 55.53             | 35.41               | -0.96       | 58.78             | 39.00                          | -0.94       | 8.10              | 6.11                  | -0.09       |                   |
| Zambia                            | 10.57                 | 9.41               | -0.05       | 57.97             | 49.02               | -0.41       | 62.04             | 55.08                          | -0.32       | 7.91              | 9.85                  | 0.09        |                   |
| Zimbabwe                          | 7.88                  | 4.90               | -0.14       | 32.12             | 31.03               | -0.05       | 37.54             | 34.39                          | -0.15       | 9.09              | 8.38                  | -0.03       |                   |

\* Nationally representative and regionally weighted

\*\* All data are from the Demographic and Health Surveys (DHS, <https://dhsprogram.com/>) with the exceptions of China (China Health and Nutrition Survey), Indonesia (Indonesian Family Life Survey), Mexico (Mexico National Survey of Health and Nutrition), Brazil (Brazil National Health Survey), and Vietnam (Vietnam Living Standards Survey).



**Supplemental Table S6. Prevalence\* of thinness and overweight for women (ages 15–49 years) and annualized change in prevalence from earliest to latest survey years\*\***

| Region                        | Country               | Earliest survey year | Latest survey year | Thinness prevalence |             |                   | Overweight prevalence |             |                   |
|-------------------------------|-----------------------|----------------------|--------------------|---------------------|-------------|-------------------|-----------------------|-------------|-------------------|
|                               |                       |                      |                    | Earliest year       | Latest year | Annualized change | Earliest year         | Latest year | Annualized change |
| East Asia & Pacific           | Cambodia              | 2000                 | 2014               | 23.84               | 16.42       | -0.53             | 7.49                  | 21.13       | 0.97              |
|                               | China                 | 1991                 | 2015               | 7.30                | 10.97       | 0.15              | 10.76                 | 25.78       | 0.63              |
|                               | Indonesia             | 1993                 | 2014               | 16.11               | 10.93       | -0.25             | 15.24                 | 40.57       | 1.21              |
|                               | Myanmar               | —                    | 2015               | —                   | 18.85       | —                 | —                     | 27.46       | —                 |
|                               | Timor-Leste           | —                    | 2009               | —                   | 30.19       | —                 | —                     | 6.75        | —                 |
|                               | Vietnam               | 1992                 | 2002               | 34.93               | 32.73       | -0.22             | 2.32                  | 5.39        | 0.31              |
| Eastern Europe & Central Asia | Albania               | —                    | 2008               | —                   | 3.84        | —                 | —                     | 44.22       | —                 |
|                               | Armenia               | 2000                 | 2015               | 4.46                | 3.42        | -0.07             | 48.70                 | 47.73       | -0.06             |
|                               | Azerbaijan            | —                    | 2006               | —                   | 5.92        | —                 | —                     | 54.75       | —                 |
|                               | Kazakhstan            | 1995                 | 1999               | 8.14                | 8.61        | 0.12              | 42.17                 | 35.64       | -1.63             |
|                               | Kyrgyz Republic       | 1997                 | 2012               | 6.74                | 7.75        | 0.07              | 34.44                 | 44.12       | 0.65              |
|                               | Moldova               | —                    | 2005               | —                   | 6.33        | —                 | —                     | 45.78       | —                 |
|                               | Tajikistan            | —                    | 2012               | —                   | 13.42       | —                 | —                     | 40.51       | —                 |
|                               | Turkey                | 1993                 | 2003               | 2.19                | 2.43        | 0.02              | 50.83                 | 58.91       | 0.81              |
| Uzbekistan                    | 1996                  | —                    | 11.71              | —                   | —           | 27.38             | —                     | —           |                   |
| Latin America & the Caribbean | Bolivia               | 1994                 | 2008               | 2.38                | 2.03        | -0.02             | 33.59                 | 56.28       | 1.62              |
|                               | Brazil                | 1996                 | 2013               | 7.29                | 3.95        | -0.20             | 35.90                 | 48.73       | 0.75              |
|                               | Colombia              | 1995                 | 2010               | 3.88                | 5.58        | 0.11              | 45.63                 | 53.42       | 0.52              |
|                               | Dominican Republic    | 1991                 | 2013               | 8.21                | 7.91        | -0.01             | 23.37                 | 57.15       | 1.54              |
|                               | Guatemala             | 1995                 | 2014               | 3.62                | 2.92        | -0.04             | 34.28                 | 62.26       | 1.47              |
|                               | Guyana                | —                    | 2009               | —                   | 11.94       | —                 | —                     | 53.27       | —                 |
|                               | Haiti                 | 1994                 | 2017               | 22.01               | 12.55       | -0.41             | 11.33                 | 39.37       | 1.22              |
|                               | Honduras              | 2005                 | 2011               | 4.35                | 4.91        | 0.09              | 54.78                 | 60.25       | 0.91              |
|                               | Mexico                | 1988                 | 2012               | 14.25               | 1.78        | -0.52             | 36.24                 | 69.71       | 1.39              |
|                               | Nicaragua             | 1998                 | 2001               | 4.52                | 3.82        | -0.24             | 52.99                 | 57.89       | 1.63              |
| Peru                          | 1992                  | 2012                 | 1.34               | 1.98                | 0.03        | 40.05             | 60.22                 | 1.01        |                   |
| Middle East & North Africa    | Egypt, Arab Rep.      | 1992                 | 2014               | 1.75                | 0.22        | -0.07             | 56.07                 | 79.64       | 1.07              |
|                               | Jordan                | 1997                 | 2012               | 2.04                | 2.84        | 0.05              | 62.73                 | 63.17       | 0.03              |
|                               | Morocco               | 1992                 | 2003               | 3.79                | 8.72        | 0.45              | 32.53                 | 48.14       | 1.42              |
|                               | Yemen, Rep.           | —                    | 2013               | —                   | 28.76       | —                 | —                     | 31.82       | —                 |
| South Asia                    | Bangladesh            | 1996                 | 2014               | 53.48               | 21.67       | -1.77             | 2.94                  | 23.63       | 1.15              |
|                               | India                 | 1998                 | 2015               | 39.76               | 26.86       | -0.76             | 10.90                 | 23.93       | 0.77              |
|                               | Maldives              | —                    | 2009               | —                   | 12.81       | —                 | —                     | 47.94       | —                 |
|                               | Nepal                 | 1996                 | 2016               | 30.41               | 19.49       | -0.55             | 1.68                  | 26.84       | 1.26              |
| Sub-Saharan Africa            | Burkina Faso          | 1992                 | 2010               | 18.28               | 18.96       | 0.04              | 8.07                  | 13.58       | 0.31              |
|                               | Burundi               | —                    | 2010               | —                   | 19.54       | —                 | —                     | 8.42        | —                 |
|                               | Cameroon              | 1998                 | 2011               | 7.23                | 8.20        | 0.07              | 21.89                 | 40.27       | 1.41              |
|                               | Central African Rep.  | 1994                 | —                  | 16.79               | —           | —                 | 6.98                  | —           | —                 |
|                               | Chad                  | 1996                 | 2014               | 22.42               | 20.63       | -0.10             | 5.90                  | 13.99       | 0.45              |
|                               | Comoros               | 1996                 | 2012               | 8.59                | 8.08        | -0.03             | 19.05                 | 46.03       | 1.69              |
|                               | Congo, Dem. Rep.      | 2007                 | 2013               | 21.15               | 15.17       | -1.00             | 14.51                 | 18.66       | 0.69              |
|                               | Congo, Rep.           | 2005                 | 2011               | 13.65               | 15.53       | 0.31              | 33.88                 | 30.60       | -0.55             |
|                               | Côte d'Ivoire         | 1994                 | 2011               | 10.60               | 9.12        | -0.09             | 16.32                 | 31.40       | 0.89              |
|                               | Ethiopia              | 2000                 | 2016               | 33.33               | 23.94       | -0.59             | 3.61                  | 8.17        | 0.28              |
|                               | Gabon                 | 2000                 | 2012               | 7.83                | 7.39        | -0.04             | 33.22                 | 53.11       | 1.66              |
|                               | Gambia                | —                    | 2013               | —                   | 23.01       | —                 | —                     | 34.56       | —                 |
|                               | Ghana                 | 1993                 | 2014               | 13.00               | 5.99        | -0.33             | 13.03                 | 43.85       | 1.47              |
|                               | Guinea                | 1999                 | 2012               | 13.30               | 16.22       | 0.22              | 13.98                 | 24.33       | 0.80              |
|                               | Kenya                 | 1993                 | 2014               | 10.64               | 9.79        | -0.04             | 14.75                 | 37.69       | 1.09              |
|                               | Lesotho               | 2004                 | 2014               | 6.35                | 3.95        | -0.24             | 49.55                 | 52.51       | 0.30              |
|                               | Liberia               | 2007                 | 2013               | 11.93               | 9.12        | -0.47             | 24.12                 | 32.68       | 1.43              |
|                               | Madagascar            | 1997                 | 2003               | 20.69               | 20.94       | 0.04              | 3.89                  | 8.19        | 0.72              |
|                               | Malawi                | 1992                 | 2015               | 10.27               | 7.17        | -0.14             | 9.54                  | 23.55       | 0.61              |
|                               | Mali                  | 1995                 | 2013               | 16.57               | 13.11       | -0.19             | 8.54                  | 20.50       | 0.66              |
|                               | Mozambique            | 1997                 | 2011               | 11.03               | 9.07        | -0.14             | 11.41                 | 18.76       | 0.52              |
|                               | Namibia               | 1992                 | 2013               | 16.67               | 17.19       | 0.02              | 24.05                 | 41.83       | 0.85              |
|                               | Niger                 | 1992                 | 2012               | 21.06               | 17.83       | -0.16             | 8.90                  | 19.28       | 0.52              |
|                               | Nigeria               | 2003                 | 2013               | 17.32               | 12.27       | -0.51             | 25.69                 | 30.40       | 0.47              |
|                               | Rwanda                | 2000                 | 2014               | 9.63                | 7.31        | -0.17             | 15.09                 | 23.62       | 0.61              |
|                               | Sao Tome and Principe | —                    | 2008               | —                   | 8.26        | —                 | —                     | 39.86       | —                 |
|                               | Senegal               | 1992                 | 2010               | 18.05               | 29.99       | 0.66              | 19.91                 | 34.18       | 0.79              |
|                               | Sierra Leone          | 2008                 | 2013               | 12.98               | 10.73       | -0.45             | 33.23                 | 22.99       | -2.05             |
|                               | Swaziland             | —                    | 2006               | —                   | 3.37        | —                 | —                     | 63.02       | —                 |
|                               | Tanzania              | 1991                 | 2015               | 10.99               | 10.22       | -0.03             | 11.73                 | 32.95       | 0.88              |
| Togo                          | 1998                  | 2013                 | 12.43              | 8.21                | -0.28       | 12.37             | 35.26                 | 1.53        |                   |
| Uganda                        | 1995                  | 2016                 | 10.82              | 9.35                | -0.07       | 9.19              | 27.41                 | 0.87        |                   |
| Zambia                        | 1992                  | 2014                 | 12.25              | 11.16               | -0.05       | 15.84             | 26.55                 | 0.49        |                   |
| Zimbabwe                      | 1994                  | 2015                 | 5.43               | 6.07                | 0.03        | 25.39             | 41.41                 | 0.76        |                   |

\* Nationally representative and regionally weighted; \*\* All data are from the Demographic and Health Surveys (DHS, <https://dhsprogram.com/>) with the exceptions of China (China Health and Nutrition Survey), Indonesia (Indonesian Family Life Survey), Mexico (Mexico National Survey of Health and Nutrition), Brazil (Brazil National Health Survey), and Vietnam (Vietnam Living Standards Survey).

**Supplemental Table S7. Prevalence\* of overweight and obesity for lowest and highest wealth quintiles, differences in earliest and latest years, and annualized changes in disparity**

| Region                        | Country                  | Earliest year quintiles |                    |                    | Most recent year quintiles |       |                    | Annualized change<br>(Diff of diff) |                    |            |
|-------------------------------|--------------------------|-------------------------|--------------------|--------------------|----------------------------|-------|--------------------|-------------------------------------|--------------------|------------|
|                               |                          | Year                    | Poorest prevalence | Richest prevalence | Difference                 | Year  | Poorest prevalence |                                     | Richest prevalence | Difference |
| East Asia & Pacific           | Cambodia                 | 2000                    | 2.87               | 16.92              | -14.06                     | 2014  | 11.69              | 32.90                               | -21.21             | -0.51      |
|                               | China                    | 1991                    | 6.06               | 12.83              | -6.77                      | 2015  | 29.80              | 22.69                               | 7.11               | 0.58       |
|                               | Indonesia                | 1993                    | 12.23              | 23.35              | -11.12                     | 2014  | 39.88              | 40.79                               | -0.92              | 0.49       |
|                               | Myanmar                  | —                       | —                  | —                  | —                          | 2015  | 15.41              | 42.09                               | -26.68             | —          |
|                               | Timor-Leste              | —                       | —                  | —                  | —                          | 2009  | 2.89               | 15.18                               | -12.29             | —          |
|                               | Vietnam                  | 1992                    | 1.12               | 4.49               | -3.38                      | 2002  | 2.47               | 10.22                               | -7.75              | -0.44      |
| Europe & Central Asia         | Albania                  | —                       | —                  | —                  | —                          | 2008  | 38.94              | 40.84                               | -1.90              | —          |
|                               | Armenia                  | 2000                    | 43.31              | 50.22              | -6.91                      | 2015  | 48.88              | 46.71                               | 2.17               | 0.61       |
|                               | Azerbaijan               | —                       | —                  | —                  | —                          | 2006  | 42.51              | 60.48                               | -17.98             | —          |
|                               | Kazakhstan               | 1995                    | 36.70              | 41.66              | -4.96                      | 1999  | 38.08              | 34.40                               | 3.68               | 2.16       |
|                               | Kyrgyz Republic          | 1997                    | 27.59              | 36.44              | -8.85                      | 2012  | 48.52              | 40.61                               | 7.91               | 1.12       |
|                               | Moldova                  | —                       | —                  | —                  | —                          | 2005  | 47.81              | 41.68                               | 6.13               | —          |
|                               | Tajikistan               | —                       | —                  | —                  | —                          | 2012  | 29.40              | 45.91                               | -16.52             | —          |
|                               | Turkey                   | 1993                    | 41.95              | 48.96              | -7.01                      | 2003  | 52.56              | 50.24                               | 2.32               | 0.93       |
| Uzbekistan                    | 1996                     | 20.37                   | 31.11              | -10.75             | —                          | —     | —                  | —                                   | —                  |            |
| Latin America & the Caribbean | Bolivia                  | 1994                    | 21.06              | 43.20              | -22.14                     | 2008  | 43.24              | 56.24                               | -13.00             | 0.65       |
|                               | Brazil                   | 1996                    | 28.60              | 33.30              | -4.70                      | 2013  | 53.37              | 41.10                               | 12.27              | 1.00       |
|                               | Colombia                 | 1995                    | 34.64              | 52.67              | -18.02                     | 2010  | 52.63              | 51.47                               | 1.16               | 1.28       |
|                               | Dominican Republic       | 1996                    | 34.27              | 53.67              | -19.40                     | 2013  | 51.04              | 57.65                               | -6.62              | 0.75       |
|                               | Guatemala                | 1995                    | 22.45              | 57.48              | -35.03                     | 2014  | 46.65              | 70.15                               | -23.50             | 0.61       |
|                               | Guyana                   | —                       | —                  | —                  | —                          | 2009  | 51.01              | 57.86                               | -6.85              | —          |
|                               | Haiti                    | 1994                    | 4.22               | 31.32              | -27.11                     | 2017  | 20.04              | 60.57                               | -40.53             | -0.58      |
|                               | Honduras                 | 2005                    | 32.81              | 65.70              | -32.89                     | 2011  | 43.48              | 67.10                               | -23.63             | 1.54       |
|                               | Mexico                   | 1988                    | 29.25              | 34.59              | -5.33                      | 2012  | 67.44              | 65.55                               | 1.89               | 0.30       |
|                               | Nicaragua                | 1998                    | 34.79              | 61.83              | -27.04                     | 2001  | 37.47              | 66.58                               | -29.10             | -0.69      |
| Peru                          | 1992                     | 28.67                   | 49.58              | -20.91             | 2012                       | 47.76 | 61.47              | -13.72                              | 0.36               |            |
| Middle East & North Africa    | Egypt, Arab Rep.         | 1995                    | 30.59              | 73.55              | -42.96                     | 2014  | 78.36              | 81.95                               | -3.59              | 2.07       |
|                               | Jordan                   | 1997                    | 57.77              | 62.38              | -4.61                      | 2012  | 64.65              | 51.32                               | 13.33              | 1.20       |
|                               | Morocco                  | 1992                    | 16.19              | 51.47              | -35.28                     | 2003  | 31.77              | 57.45                               | -25.68             | 0.87       |
|                               | Yemen, Rep.              | —                       | —                  | —                  | —                          | 2013  | 8.55               | 56.12                               | -47.57             | —          |
| South Asia                    | Bangladesh               | 1996                    | 0.61               | 17.41              | -16.81                     | 2014  | 8.15               | 46.89                               | -38.74             | -1.22      |
|                               | India                    | 1998                    | 1.64               | 29.18              | -27.54                     | 2015  | 6.96               | 41.06                               | -34.09             | -0.39      |
|                               | Maldives                 | —                       | —                  | —                  | —                          | 2009  | 38.04              | 54.91                               | -16.87             | —          |
|                               | Nepal                    | 1996                    | 1.03               | 9.25               | -8.22                      | 2016  | 12.07              | 52.82                               | -40.75             | -1.63      |
| Sub-Saharan Africa            | Burkina Faso             | 1992                    | 4.78               | 22.01              | -17.23                     | 2010  | 4.49               | 39.29                               | -34.81             | -0.98      |
|                               | Burundi                  | —                       | —                  | —                  | —                          | 2010  | 3.97               | 24.84                               | -20.87             | —          |
|                               | Cameroon                 | 1998                    | 8.76               | 39.41              | -30.65                     | 2011  | 12.14              | 61.43                               | -49.29             | -1.43      |
|                               | Central African Republic | 1994                    | 4.18               | 17.27              | -13.10                     | —     | —                  | —                                   | —                  | —          |
|                               | Chad                     | 1996                    | 2.72               | 17.70              | -14.98                     | 2014  | 8.78               | 33.89                               | -25.12             | -0.56      |
|                               | Comoros                  | 1996                    | 17.09              | 28.51              | -11.42                     | 2012  | 34.34              | 57.49                               | -23.16             | -0.73      |
|                               | Congo, Dem. Rep.         | 2007                    | 9.26               | 40.48              | -31.22                     | 2013  | 7.36               | 47.62                               | -40.25             | -1.50      |
|                               | Congo, Rep.              | 2005                    | 17.38              | 53.91              | -36.53                     | 2011  | 13.58              | 57.41                               | -43.83             | -1.22      |
|                               | Côte d'Ivoire            | 1994                    | 5.62               | 33.41              | -27.79                     | 2011  | 13.41              | 54.65                               | -41.23             | -0.79      |
|                               | Ethiopia                 | 2000                    | 1.29               | 11.24              | -9.95                      | 2016  | 2.90               | 23.83                               | -20.93             | -0.69      |
|                               | Gabon                    | 2000                    | 16.49              | 46.51              | -30.02                     | 2012  | 35.54              | 60.56                               | -25.01             | 0.42       |
|                               | Gambia                   | —                       | —                  | —                  | —                          | 2013  | 23.27              | 51.57                               | -28.30             | —          |
|                               | Ghana                    | 1993                    | 5.48               | 29.81              | -24.33                     | 2014  | 16.67              | 63.89                               | -47.21             | -1.09      |
|                               | Guinea                   | 1999                    | 5.65               | 36.99              | -31.34                     | 2012  | 7.61               | 51.00                               | -43.38             | -0.93      |
|                               | Kenya                    | 1993                    | 9.61               | 29.53              | -19.92                     | 2014  | 13.57              | 58.91                               | -45.34             | -1.21      |
|                               | Lesotho                  | 2004                    | 32.86              | 64.87              | -32.02                     | 2014  | 29.63              | 64.33                               | -34.70             | -0.27      |
|                               | Liberia                  | 2007                    | 11.45              | 45.11              | -33.66                     | 2013  | 19.52              | 51.71                               | -32.18             | 0.25       |
|                               | Madagascar               | 1997                    | 2.66               | 12.28              | -9.62                      | 2003  | 3.24               | 17.23                               | -13.99             | -0.73      |
|                               | Malawi                   | 1992                    | 4.11               | 18.86              | -14.74                     | 2015  | 13.35              | 42.70                               | -29.35             | -0.64      |
|                               | Mali                     | 1995                    | 4.02               | 25.52              | -21.51                     | 2013  | 13.18              | 42.76                               | -29.57             | -0.45      |
|                               | Mozambique               | 1997                    | 4.34               | 30.72              | -26.38                     | 2011  | 6.58               | 48.23                               | -41.65             | -1.09      |
|                               | Namibia                  | 1992                    | 10.27              | 50.59              | -40.32                     | 2013  | 17.28              | 61.65                               | -44.37             | -0.19      |
|                               | Niger                    | 1998                    | 3.88               | 30.63              | -26.75                     | 2012  | 11.23              | 43.56                               | -32.33             | -0.40      |
|                               | Nigeria                  | 2003                    | 12.98              | 45.18              | -32.20                     | 2013  | 12.50              | 50.27                               | -37.77             | -0.56      |
|                               | Rwanda                   | 2000                    | 10.49              | 28.39              | -17.89                     | 2014  | 11.65              | 45.55                               | -33.90             | -1.14      |
|                               | Sao Tome and Principe    | —                       | —                  | —                  | —                          | 2008  | 31.17              | 51.62                               | -20.45             | —          |
|                               | Senegal                  | 2005                    | 15.48              | 61.11              | -45.62                     | 2010  | 17.19              | 45.32                               | -28.12             | 3.50       |
|                               | Sierra Leone             | 2008                    | 27.02              | 49.89              | -22.87                     | 2013  | 12.47              | 45.54                               | -33.07             | -2.04      |
|                               | Swaziland                | —                       | —                  | —                  | —                          | 2006  | 49.43              | 70.65                               | -21.22             | —          |
|                               | Tanzania                 | 1996                    | 7.15               | 31.81              | -24.66                     | 2015  | 14.73              | 59.79                               | -45.06             | -1.07      |
|                               | Togo                     | 1998                    | 6.07               | 31.81              | -25.74                     | 2013  | 14.57              | 60.01                               | -45.44             | -1.31      |
|                               | Uganda                   | 1995                    | 4.91               | 19.25              | -14.35                     | 2016  | 9.80               | 52.37                               | -42.57             | -1.34      |
| Zambia                        | 1996                     | 6.98                    | 23.83              | -16.85             | 2014                       | 10.19 | 49.19              | -39.00                              | -1.23              |            |
| Zimbabwe                      | 1994                     | 15.24                   | 39.23              | -23.99             | 2015                       | 23.38 | 61.15              | -37.78                              | -0.66              |            |

\* All data weighted to be nationally representative; Data sources: All data are from the Demographic and Health Surveys (DHS, <https://dhsprogram.com/>) with the exceptions of China (China Health and Nutrition Survey), Indonesia (Indonesian Family Life Survey), Mexico (Mexico's National Survey of Health and Nutrition), Brazil (Brazilian National Health Survey), and Vietnam (Vietnam Living Standards Survey).

**Supplemental Table S8. Total estimated sales volumes and annualized change in sales volume of sugar-sweetened beverages\* 2004 and 2017**

| Region                     | Country**                   | mL per capita per day |        | Annualized change |
|----------------------------|-----------------------------|-----------------------|--------|-------------------|
|                            |                             | 2014                  | 2017   |                   |
| East Asia & Pacific        | Cambodia                    | 19.18                 | 41.64  | 1.60              |
|                            | China                       | 38.63                 | 84.11  | 3.25              |
|                            | Indonesia                   | 23.56                 | 57.53  | 2.43              |
|                            | Lao People's Democratic Rep | 19.45                 | 43.01  | 1.68              |
|                            | Malaysia                    | 73.42                 | 120.00 | 3.33              |
|                            | Myanmar                     | 6.85                  | 15.07  | 0.59              |
|                            | Philippines (The)           | 114.52                | 164.66 | 3.58              |
|                            | Thailand                    | 106.58                | 157.53 | 3.64              |
|                            | Viet Nam                    | 18.08                 | 116.16 | 7.01              |
| Europe & Central Asia      | Bulgaria                    | 221.10                | 289.04 | 4.85              |
|                            | Romania                     | 183.56                | 278.90 | 6.81              |
|                            | Turkey                      | 104.93                | 165.75 | 4.34              |
|                            | Ukraine                     | 79.73                 | 101.37 | 1.55              |
| Latin America & Caribbean  | Argentina                   | 465.75                | 363.01 | -7.34             |
|                            | Brazil                      | 196.71                | 202.47 | 0.41              |
|                            | Colombia                    | 163.56                | 198.90 | 2.52              |
|                            | El Salvador                 | 213.70                | 273.42 | 4.27              |
|                            | Honduras                    | 121.37                | 136.16 | 1.06              |
|                            | Mexico                      | 410.14                | 452.60 | 3.03              |
|                            | Panama                      | 209.59                | 215.89 | 0.45              |
|                            | Paraguay                    | 117.81                | 214.52 | 6.91              |
|                            | Peru                        | 118.36                | 224.93 | 7.61              |
| Middle East & North Africa | Egypt                       | 78.90                 | 104.38 | 1.82              |
|                            | Iraq                        | 59.18                 | 91.51  | 2.31              |
|                            | Jordan                      | 90.68                 | 118.08 | 1.96              |
|                            | Lebanon                     | 95.07                 | 129.59 | 2.47              |
|                            | Morocco                     | 45.21                 | 46.30  | 0.08              |
| South Asia                 | India                       | 5.75                  | 15.89  | 0.72              |
| Sub-Saharan Africa         | Angola                      | 20.00                 | 43.56  | 1.68              |
|                            | Ethiopia                    | 6.30                  | 20.00  | 0.98              |
|                            | Ghana                       | 11.78                 | 37.81  | 1.86              |
|                            | Nigeria                     | 23.01                 | 35.89  | 0.92              |
|                            | South Africa                | 157.81                | 266.58 | 7.77              |
|                            |                             | Tanzania              | 4.93   | 7.12              |

\* Sugar-sweetened beverages include regular cola carbonates, non-cola carbonates (e.g., lemon/lime and orange carbonates, ginger ale, mixers), liquid and powder concentrates, juice drinks (up to 24% juice), nectars (25-99% juice), ready-to-drink coffees and teas, sports and energy drinks, and Asian specialty drinks.

\*\* Included are low- and middle-income countries for which Euromonitor had data for the majority of sugar-sweetened beverage categories; countries with modeled data were excluded.

Data source: Euromonitor International Limited 2018 © All rights reserved

**Supplemental Table S9. Total estimated sales volumes and annualized changes in sales volume of nonessential junk foods\* for 2004 and 2017**

| Region                     | Country**    | grams per capita per day |       | Annualized change |
|----------------------------|--------------|--------------------------|-------|-------------------|
|                            |              | 2004                     | 2017  |                   |
| East Asia & Pacific        | China        | 18.90                    | 38.90 | 1.43              |
|                            | Indonesia    | 11.51                    | 19.18 | 0.55              |
|                            | Malaysia     | 25.48                    | 31.51 | 0.43              |
|                            | Philippines  | 13.70                    | 18.36 | 0.33              |
|                            | Thailand     | 7.95                     | 15.89 | 0.57              |
|                            | Viet Nam     | 3.84                     | 12.60 | 0.63              |
| Europe & Central Asia      | Bulgaria     | 35.89                    | 47.40 | 0.82              |
|                            | Romania      | 23.84                    | 49.32 | 1.82              |
|                            | Turkey       | 50.14                    | 80.82 | 2.19              |
|                            | Ukraine      | 35.89                    | 37.81 | 0.14              |
| Latin America & Caribbean  | Argentina    | 76.99                    | 87.95 | 0.78              |
|                            | Brazil       | 44.38                    | 51.78 | 0.53              |
|                            | Colombia     | 24.38                    | 30.96 | 0.47              |
|                            | Mexico       | 75.07                    | 75.07 | 0.00              |
| Middle East & North Africa | Algeria      | 31.23                    | 29.86 | -0.10             |
|                            | Egypt        | 19.73                    | 34.79 | 1.08              |
|                            | Morocco      | 3.01                     | 9.04  | 0.43              |
|                            | Tunisia      | 3.01                     | 3.56  | 0.04              |
| South Asia                 | India        | 27.12                    | 39.73 | 0.90              |
| Sub-Saharan Africa         | Nigeria      | 18.90                    | 38.90 | 1.43              |
|                            | South Africa | 11.51                    | 19.18 | 0.55              |

\* Nonessential junk foods include cakes, pastries, chocolate & sugar confectionery, chilled and shelf-stable desserts, frozen baked goods, frozen desserts, ice cream, sweet biscuits, snack bars, processed fruit snacks, salty snacks, savoury biscuits, popcorn, and other savoury snacks.

\*\* Included are low- and middle-income countries for which Euromonitor had data for the majority of junk food categories; countries with modeled data were excluded.

Data source: Euromonitor International Limited 2018 © All rights reserved

**Supplemental Figure S1. Changes in nationally representative prevalence of individual preschooler and household double burden from selected countries' earliest to latest survey years,\* weighted by 2010 populations**

**S1a. Total double burden: Overweight in woman or child + wasting or stunting in child or thinness in woman**

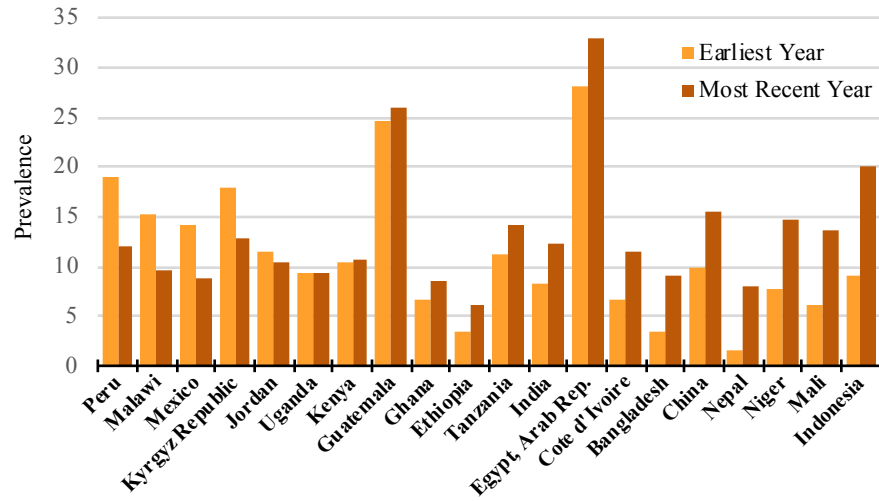

**S1c. Overweight + stunting in single child**

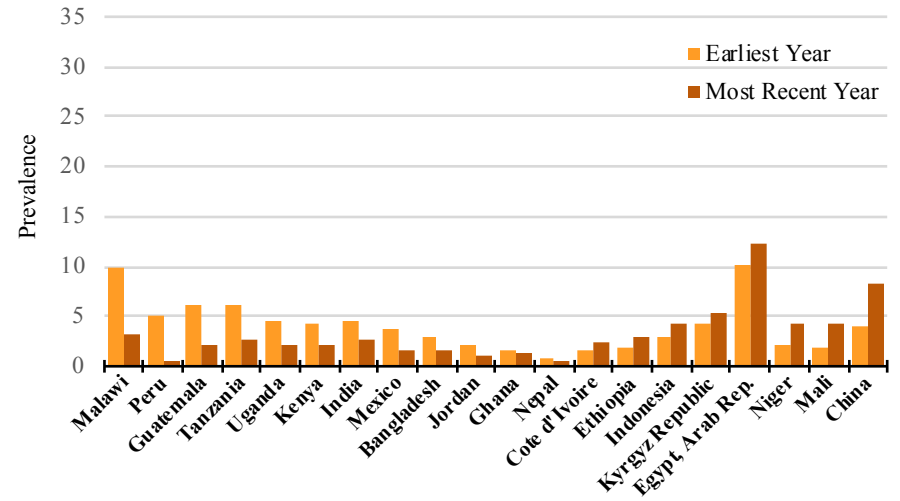

**S1b. Total double burden: Annualized change in overweight in woman or child + wasting or stunting in child or thinness in woman**

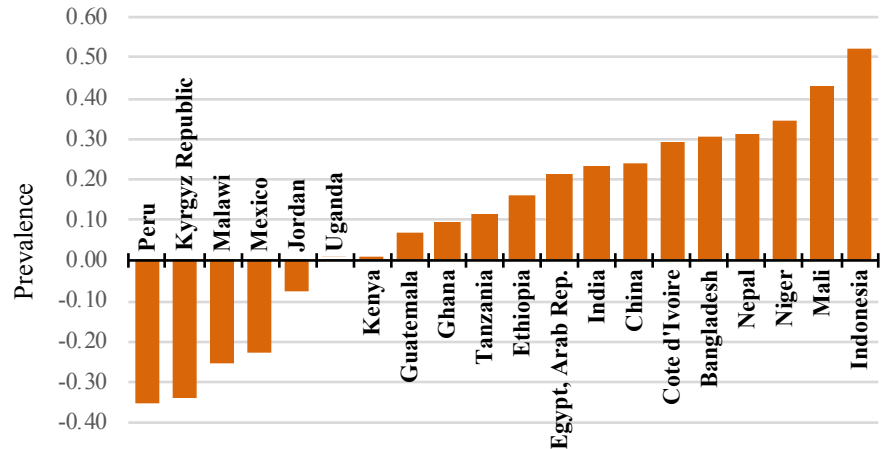

**S1d. Annualized Change in overweight + stunting in single child**

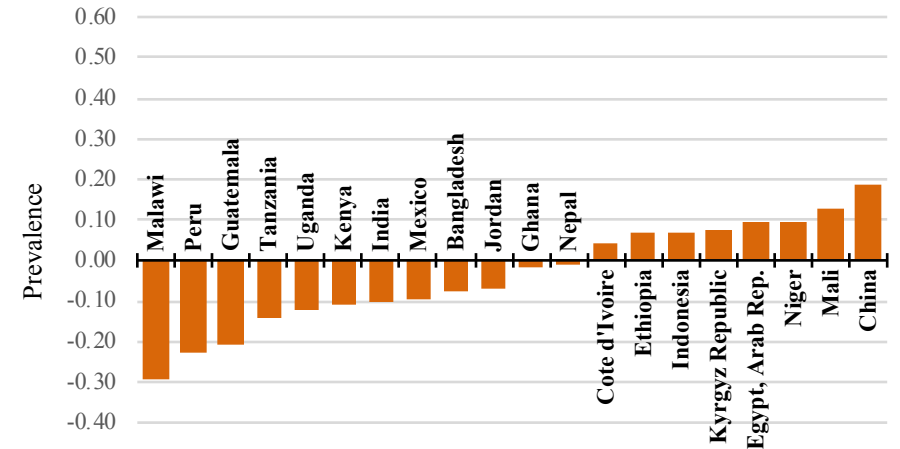

\* Countries presented here had earliest-to-latest-year data spanning 15 or more years, latest-year data after 2010, and a population greater than  $\approx 15$  million (with the exception of Jordan and Kyrgyz Republic, which both had smaller populations but were included for regional representation). The data presented is from years spanning 1988 to 2016, but exact years vary by country. The span of earliest-to-latest years collected ranges from 15 years to 24 years. All data are from the Demographic and Health Surveys (DHS, <https://dhsprogram.com/>) with the exceptions of China (China Health and Nutrition Survey), Indonesia (Indonesian Family Life Survey), Mexico (Mexico National Survey of Health and Nutrition), Brazil (Brazil National Health Survey), and Vietnam (Vietnam Living Standards Survey).

**Supplemental Figure S2. Trends in estimated total SSB\* and junk food\*\* sales volumes, 2004–2017**

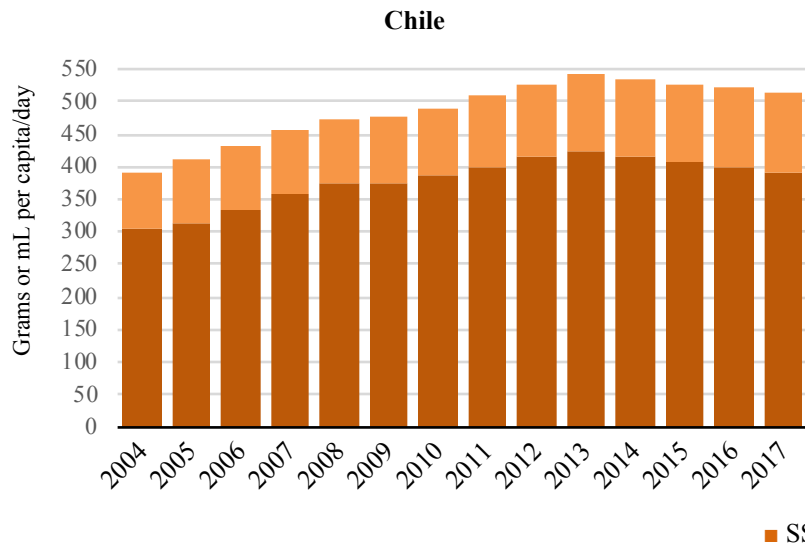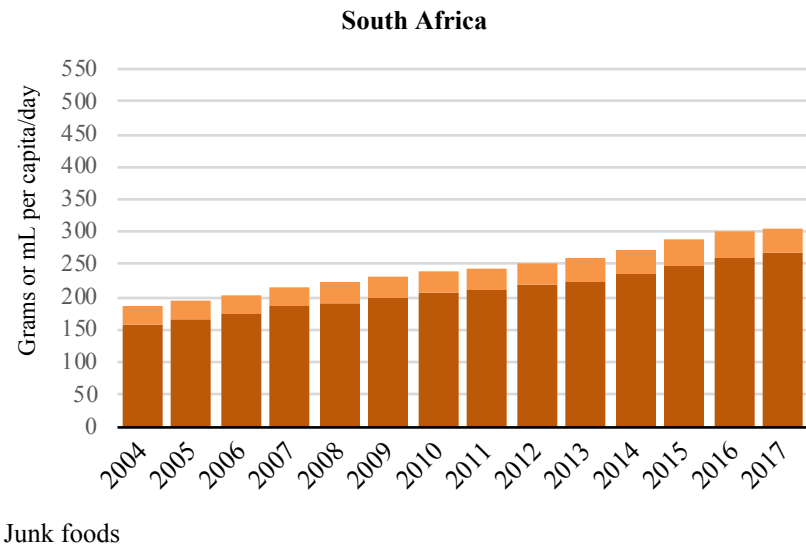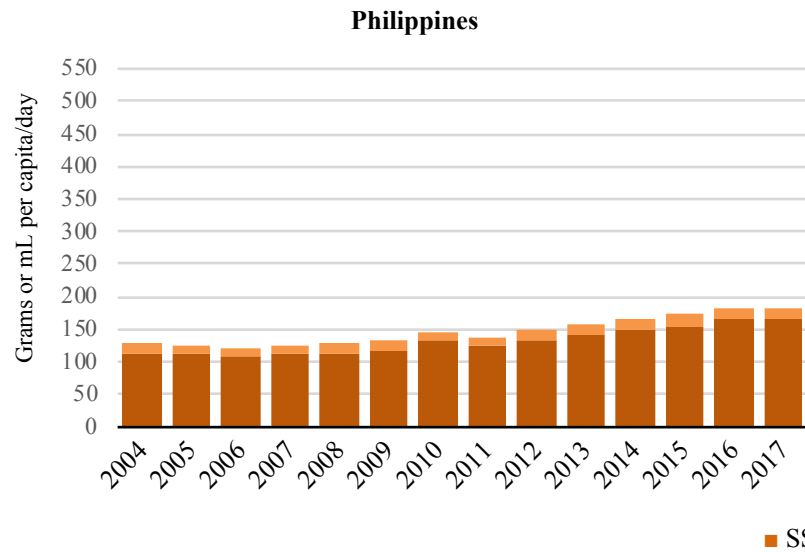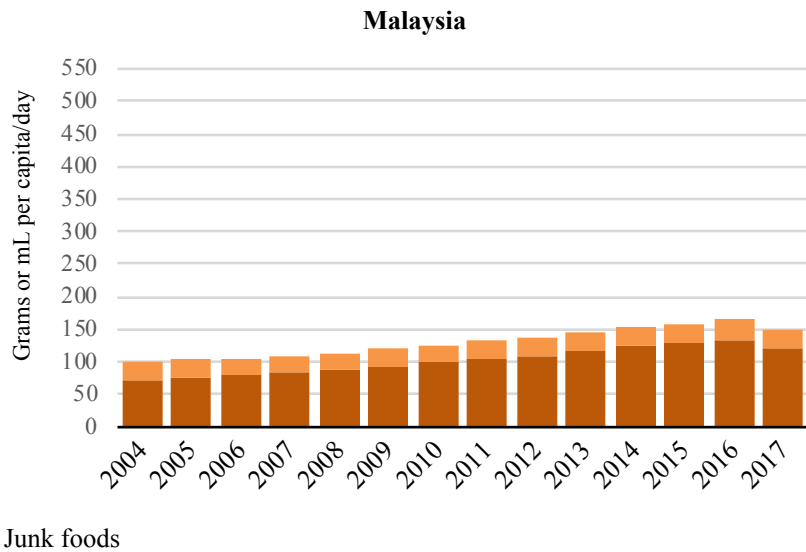

\* Sugar-sweetened beverages (SSBs): include regular cola carbonates, non-cola carbonates (i.e., lemon/lime and orange carbonates, ginger ale, mixers), liquid and powder concentrates, juice drinks (up to 24% juice), nectars (25–99% juice), ready-to-drink coffees and teas, sports and energy drinks, and Asian specialty drinks.

\*\* “Junk” foods include cakes, pastries, confectionery, chilled and shelf-stable desserts and snacks, frozen desserts, ice cream, flavored yogurts, sweet biscuits, snack bars, processed fruit snacks, salty snacks, savory biscuits, popcorn, and other savory snacks.

### Supplemental Figure S3. Regressions of global trends in estimated total SSB\* sales in LMICs\*\*

#### S3a. Annualized change in SSB sales, 2004–2017

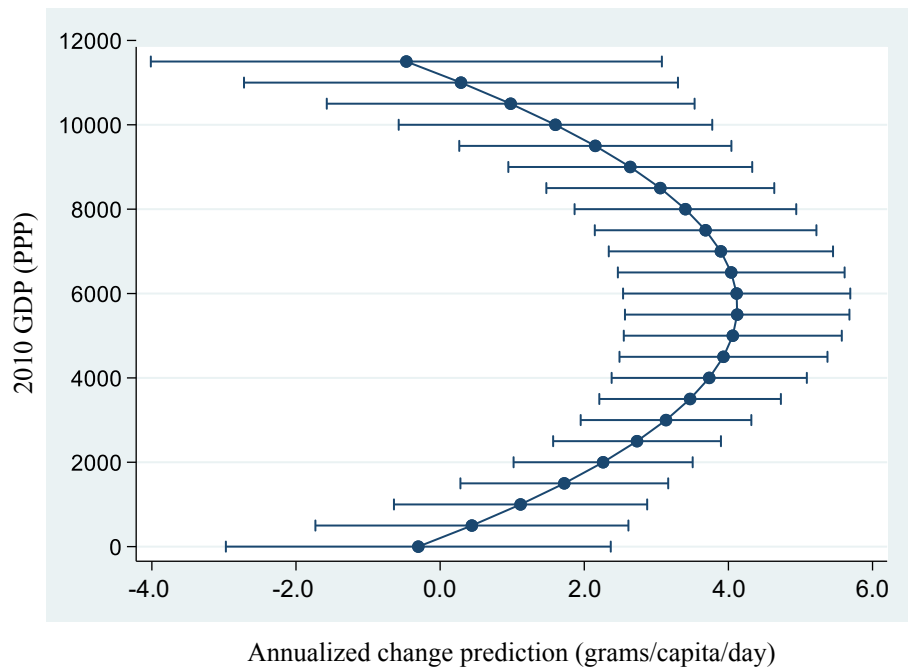

#### S3b. 2017 SSB sales

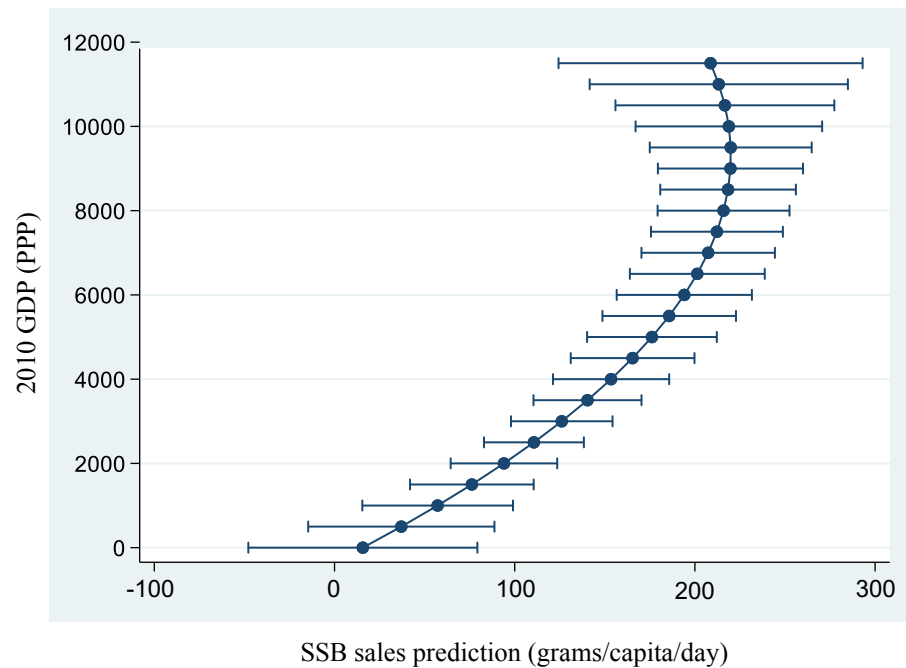

\* Sugar-sweetened beverages (SSBs) include regular cola carbonates, noncola carbonates (e.g., lemon/lime and orange carbonates, ginger ale, mixers), liquid and powder concentrates, juice drinks (up to 24% juice), nectars (25–99% juice), ready-to-drink coffees and teas, sports and energy drinks, and Asian specialty drinks.

\*\* Low- and middle-income countries: includes LMICs for which Euromonitor had data for the majority of SSB categories. Countries with modeled data were excluded. Data source: Euromonitor International Limited 2018 © All rights reserved

### Supplemental Figure S4. Regressions of global trends in estimated total junk food\* sales in LMICs\*\*

#### S4a. Annualized change in junk food sales, 2004–2017

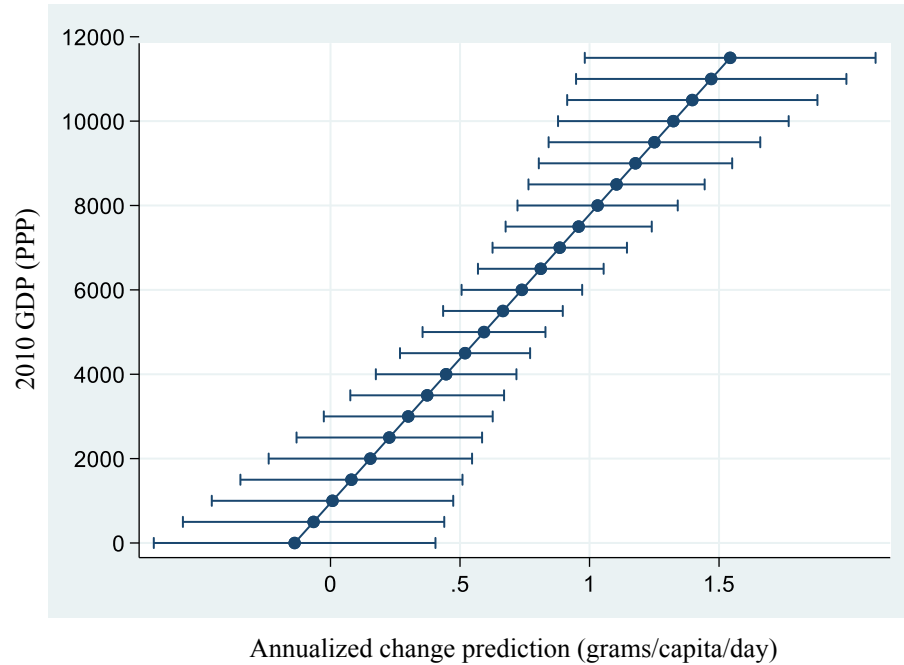

#### S4b. 2017 junk food sales

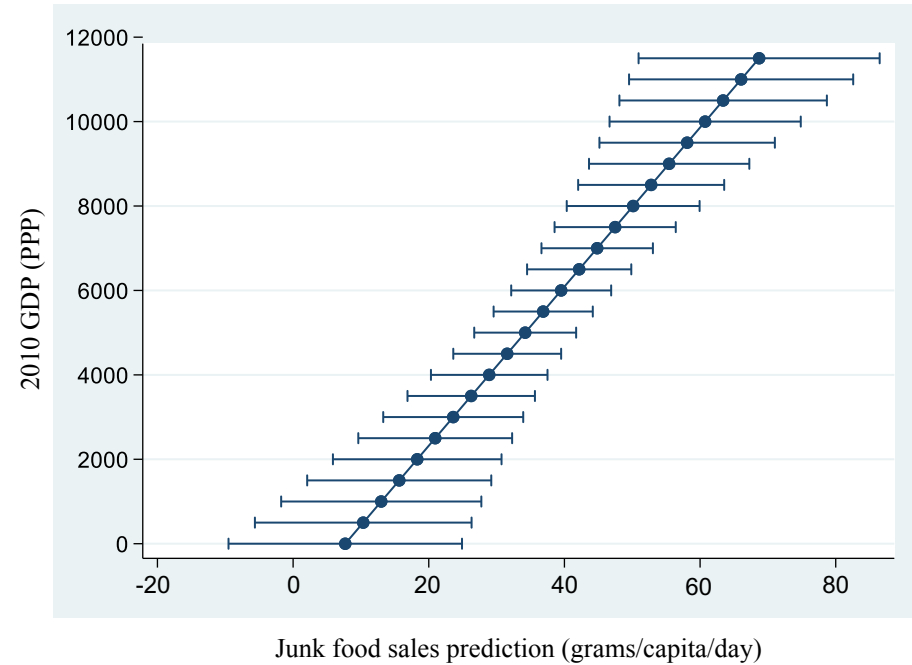

\* “Junk” foods include cakes, pastries, chocolate & sugar confectioneries, chilled and shelf-stable desserts, frozen baked goods, frozen desserts, ice cream, sweet biscuits, snack bars, processed fruit snacks, salty snacks, savory biscuits, popcorn, pretzels, and other savory snacks.

\*\* Low- and middle-income countries: includes LMICs for which Euromonitor had data for the majority of SSB categories. Countries with modeled data were excluded. Data source: Euromonitor International Limited 2018 © All rights reserved



**Supplemental Figure S5. Trends in estimated total SSB\* and junk food\*\* sales and restaurant\*\*\* banner sales in China**

**S5a. Trends in estimated total retail + foodservice sales volumes for SSBs\* and junk foods,\*\* 2004–2017**

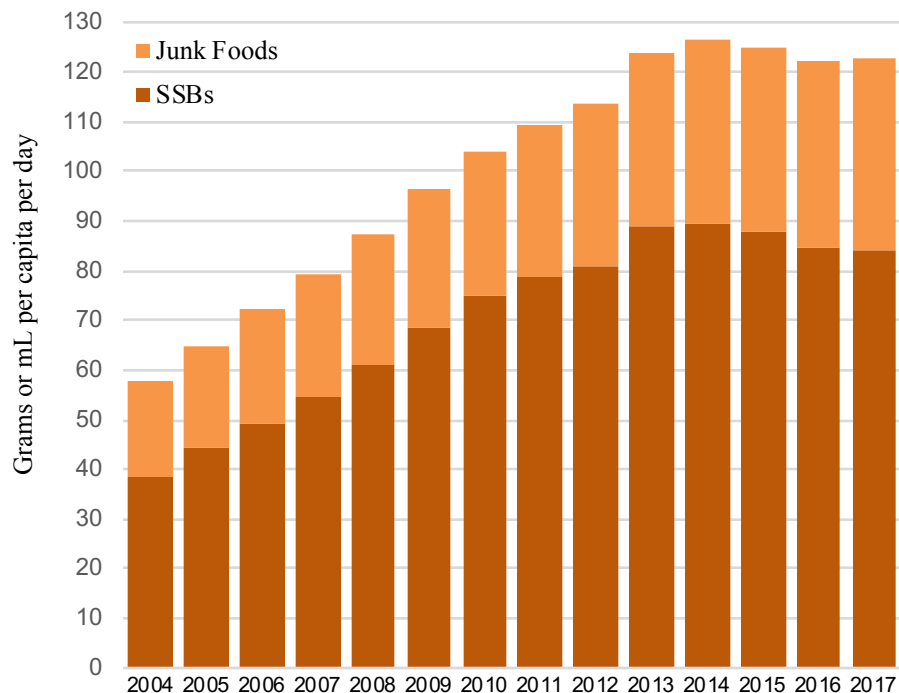

**S5b. Trends in total banner sales from quick-service, café, and full-service restaurant retailers, 2006–2017**

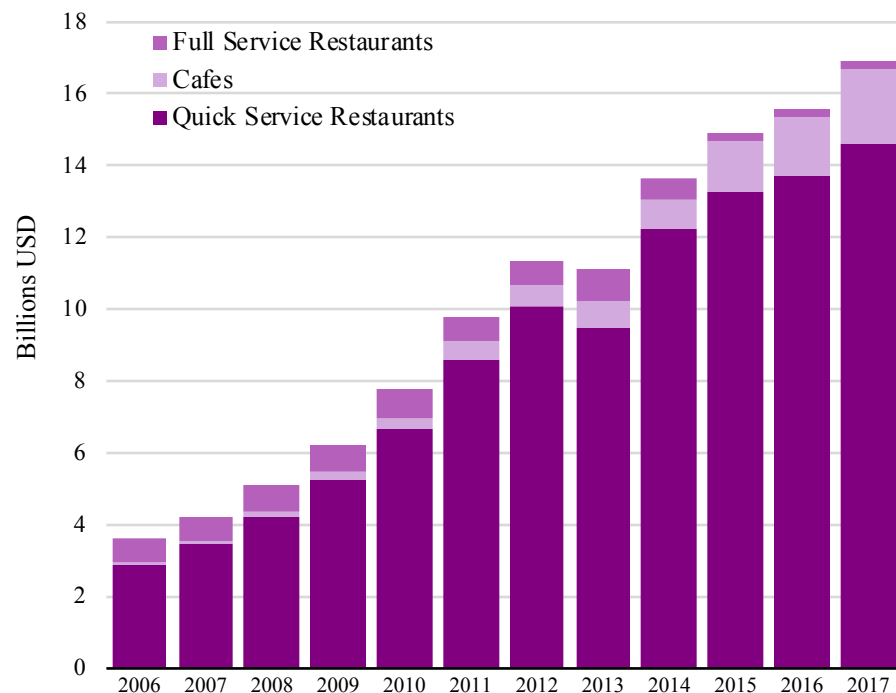

Data source: Euromonitor International Limited 2018 © All rights reserved

Source: Authors' analysis of data from [www.Planetretail.net](http://www.Planetretail.net).

\* Sugar-sweetened beverages (SSBs): include regular cola carbonates, non-cola carbonates (i.e., lemon/lime and orange carbonates, ginger ale, mixers, and other non-cola carbonates), liquid and powder concentrates, juice drinks (up to 24% juice), nectars (25–99% juice), ready-to-drink coffees and teas, sports and energy drinks, and Asian specialty drinks

\*\* “Junk” foods include cakes, pastries, confectionery, chilled and shelf-stable desserts and snacks, frozen desserts, ice cream, flavored yogurts, sweet biscuits, snack bars, processed fruit snacks, salty snacks, savory biscuits, popcorn, and other savory snacks.

\*\*\* Cafes include bars, coffee shops/tea houses, pubs, and snack bars. Quick service restaurants include Arab-style fast food, Asian fast food, fast food chicken outlets, fish & chips/seafood, hamburger outlets, ice cream & juices, Mexican fast food, pizza/pasta fast food, and sandwich outlets. Full service restaurants include American-style restaurants, Asian restaurants, barbecue/steakhouse, buffet-style restaurants, Caribbean-style restaurants, Italian restaurants, Mexican restaurants, restaurants, seafood restaurants, tapas, and theme restaurants. Sales figures are for food retail chains PlanetRetail followed per country. PlanetRetail follows the leading national chains, not smaller chains, independents, or regional chains in a country. The total sales for a given country are thus an underestimate of all modern food retail sales but the trends are meaningful.

**Supplemental Figure S6. Trends in estimated total SSB\* and junk food\*\* sales and restaurant\*\*\* banner sales in India**

**S6a. Trends in estimated total retail + foodservice sales volumes for sugar-sweetened beverages\* and junk foods,\*\* 2004–2017**

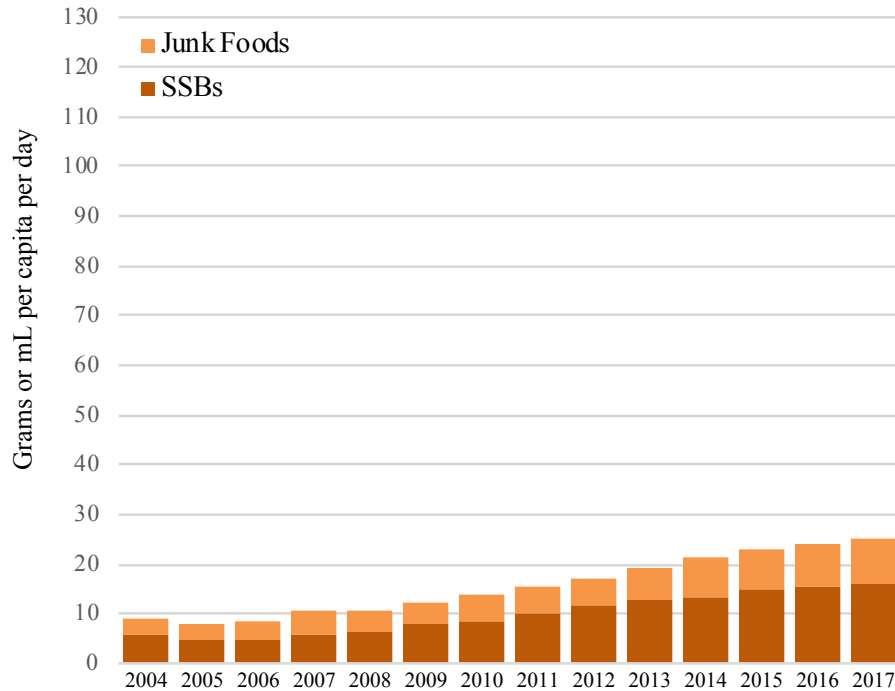

**S6b. Trends in total banner sales from quick-service, café, and full-service restaurant retailers, 2006–2017**

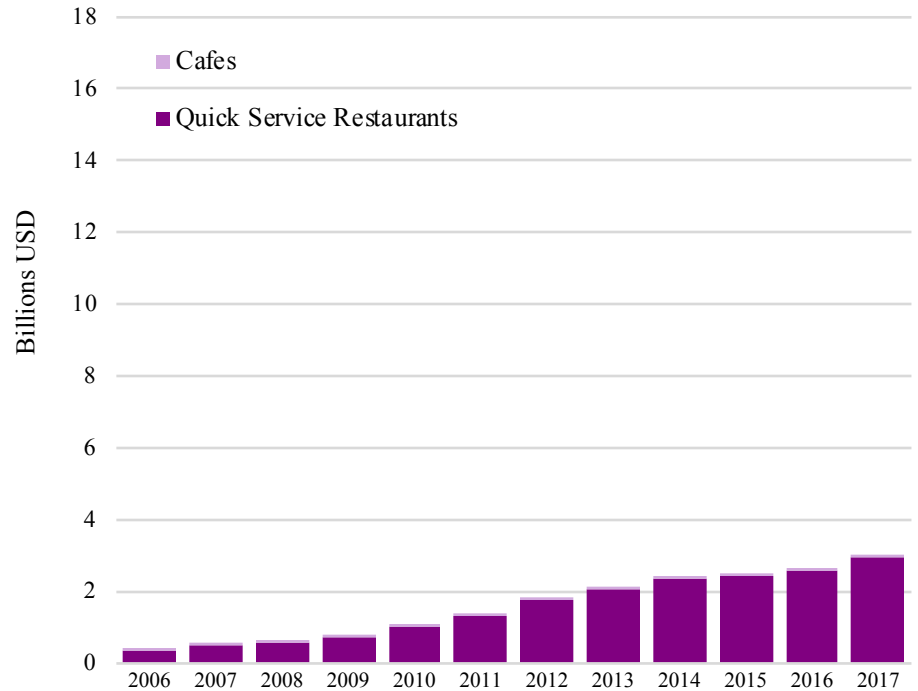

Data source: Euromonitor International Limited 2018 © All rights reserved

Source: Authors' analysis of data from [www.PlanetRetail.net](http://www.PlanetRetail.net).

\* Sugar-sweetened beverages: include regular cola carbonates, non-cola carbonates (i.e., lemon/lime and orange carbonates, ginger ale, mixers, and other non-cola carbonates), liquid and powder concentrates, juice drinks (up to 24% juice), nectars (25–99% juice), ready-to-drink coffees and teas, sports and energy drinks, and Asian specialty drinks

\*\* “Junk” foods include cakes, pastries, confectionery, chilled and shelf-stable desserts and snacks, frozen desserts, ice cream, flavored yogurts, sweet biscuits, snack bars, processed fruit snacks, salty snacks, savory biscuits, popcorn, and other savory snacks.

\*\*\* Cafes include bars, coffee shops/tea houses, pubs, and snack bars. Quick service restaurants include Arab-style fast food, Asian fast food, fast food chicken outlets, fish & chips/seafood, hamburger outlets, ice cream & juices, Mexican fast food, pizza/pasta fast food, and sandwich outlets. Full service restaurants include American-style restaurants, Asian restaurants, barbecue/steakhouse, buffet-style restaurants, Caribbean-style restaurants, Italian restaurants, Mexican restaurants, restaurants, seafood restaurants, tapas, and theme restaurants. Sales figures are for food retail chains PlanetRetail followed per country. PlanetRetail follows the leading national chains, not smaller chains, independents, or regional chains in a country. The total sales for a given country are thus an underestimate of all modern food retail sales but the trends are meaningful.
